# Supplementary material for: Co(ii), Ni(ii), Cu(ii) and Cd(ii)-thiocarbonohydrazone complexes: spectroscopic, DFT, thermal, and electrical conductivity studies
Source: Royal Society of Chemistry journal article supplement (doi:10.1039/d1ra06902k), 2021-01-01
Supplement: d1ra06902k1.pdf [file d1ra06902k1.pdf]

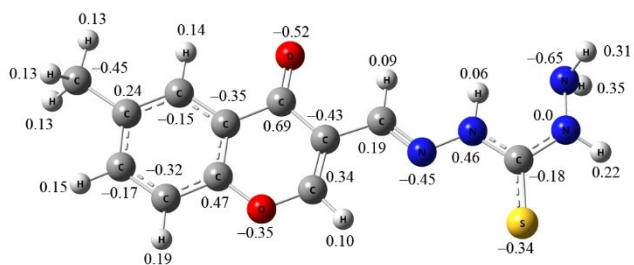

**Figure. S1** Electrostatic potential (ESP) charges distributions for ligand predicted using B3LYP/6-31G(d) calculations.

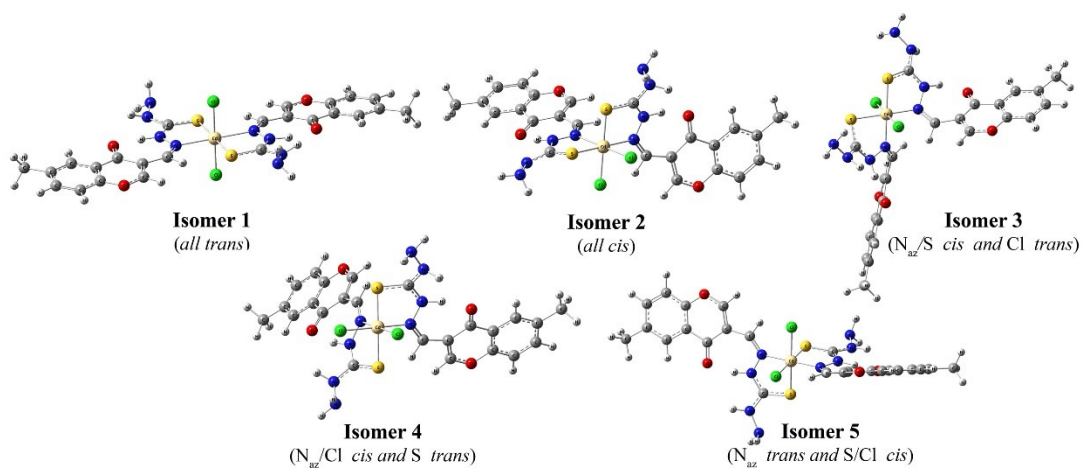

**Figure S2.** Optimized geometries of the suggested geometrical isomers for  $[\text{Cd}(\text{MCMT})_2\text{Cl}_2]$  complex.

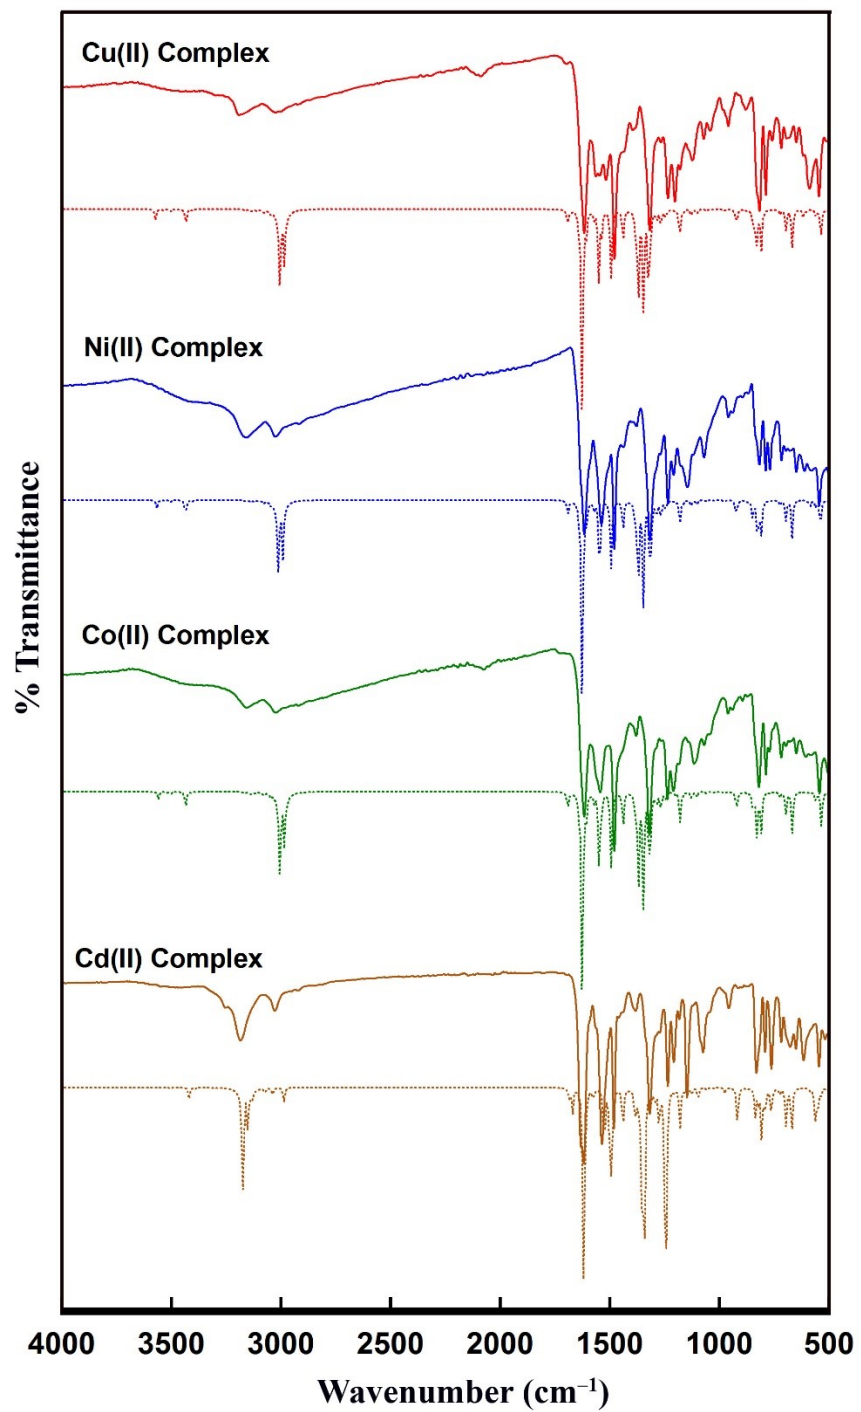

**Figure S3.** FT-IR spectra of transition metal complexes; experimental (solid line) and calculated. (dashed line).

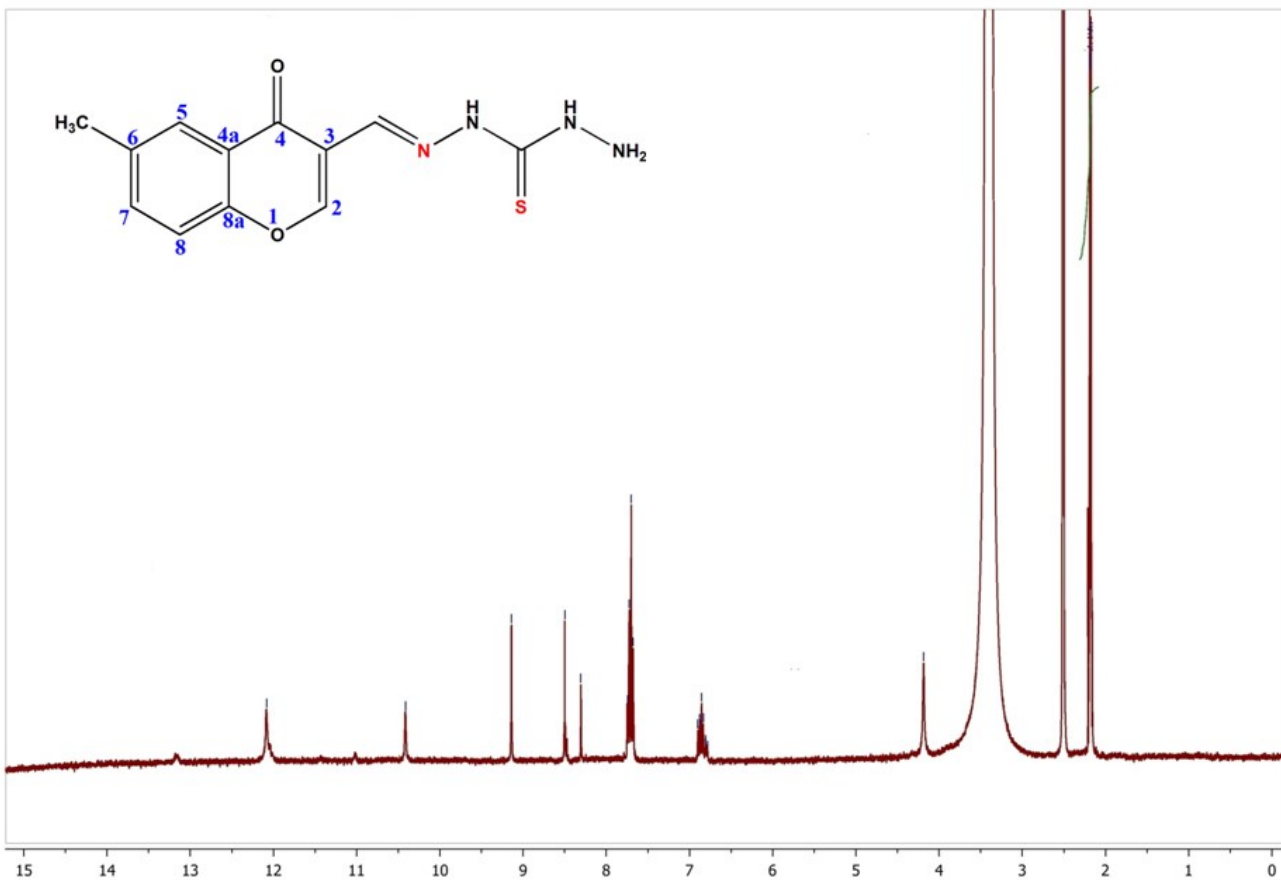

**Figure S4.**  $^1\text{H}$ NMR spectrum of MCMT ligand in DMSO- $d_6$ .

### XYZ coordinates and total energies (HF) for all the calculated structures

#### xyz coordinates of diamino-thione tautomeric structure (T-1)

|   |           |           |           |
|---|-----------|-----------|-----------|
| C | -0.428016 | -1.506959 | -0.368016 |
| C | -2.723655 | -1.124732 | -0.089601 |
| C | -2.540963 | 0.260876  | -0.162117 |
| C | -0.122422 | -0.184628 | -0.454161 |
| H | -4.097519 | -2.761167 | 0.143791  |
| H | 0.314407  | -2.294019 | -0.434049 |
| C | -3.992428 | -1.682367 | 0.091899  |
| C | -3.668476 | 1.092442  | -0.048085 |
| C | -4.943151 | 0.569334  | 0.132960  |
| C | -5.083808 | -0.834446 | 0.200828  |
| H | -3.502577 | 2.164098  | -0.107376 |
| H | -6.073112 | -1.263354 | 0.342223  |

|   |           |           |           |
|---|-----------|-----------|-----------|
| C | -6.154102 | 1.464027  | 0.255075  |
| H | -6.885218 | 1.257028  | -0.536298 |
| H | -6.666370 | 1.314495  | 1.213617  |
| H | -5.875958 | 2.519603  | 0.185562  |
| C | -1.188812 | 0.825500  | -0.354539 |
| O | -0.973384 | 2.036318  | -0.425496 |
| O | -1.667964 | -1.998576 | -0.192920 |
| C | 1.249474  | 0.279989  | -0.644629 |
| H | 1.375715  | 1.366606  | -0.694440 |
| N | 2.225753  | -0.550283 | -0.743555 |
| N | 3.458247  | -0.017694 | -0.918700 |
| H | 3.590340  | 0.994128  | -0.980289 |
| C | 4.578292  | -0.785577 | -1.038694 |
| S | 4.664414  | -2.452469 | -1.009503 |
| N | 5.726471  | -0.034784 | -1.170273 |
| H | 6.551621  | -0.571447 | -1.414616 |
| N | 5.665466  | 1.348196  | -1.420617 |
| H | 6.297269  | 1.833471  | -0.787221 |
| H | 5.941377  | 1.552761  | -2.381302 |

HF= -1232.0856376

**xyz coordinates of imino-thiol tautomeric structure (T-2)**

|   |           |           |           |
|---|-----------|-----------|-----------|
| C | -0.382801 | -1.459625 | -0.408171 |
| C | -2.681889 | -1.112067 | -0.109975 |
| C | -2.518467 | 0.275999  | -0.179813 |
| C | -0.093535 | -0.134124 | -0.492799 |
| H | -4.032146 | -2.767503 | 0.129244  |
| H | 0.365628  | -2.239712 | -0.482221 |
| C | -3.941706 | -1.687240 | 0.079884  |
| C | -3.656153 | 1.092134  | -0.054276 |
| C | -4.922130 | 0.551461  | 0.135281  |
| C | -5.043388 | -0.854367 | 0.199992  |
| H | -3.505111 | 2.166075  | -0.111610 |
| H | -6.025744 | -1.296854 | 0.347848  |
| C | -6.143869 | 1.429455  | 0.270195  |
| H | -6.880627 | 1.212138  | -0.513116 |
| H | -6.643607 | 1.273374  | 1.234316  |
| H | -5.881020 | 2.488705  | 0.197440  |
| C | -1.176202 | 0.859877  | -0.381071 |
| O | -0.978861 | 2.073477  | -0.449540 |
| O | -1.615271 | -1.970338 | -0.224399 |
| C | 1.265439  | 0.361519  | -0.692920 |
| H | 1.367040  | 1.449128  | -0.744476 |
| N | 2.269007  | -0.437070 | -0.799881 |

|   |          |           |           |
|---|----------|-----------|-----------|
| N | 3.490091 | 0.110229  | -0.981515 |
| H | 3.655256 | 1.116584  | -1.046100 |
| C | 4.611614 | -0.662855 | -1.117739 |
| N | 5.785887 | 1.261341  | -1.340466 |
| H | 6.444031 | 1.542733  | -0.610869 |
| H | 6.265515 | 1.494583  | -2.211997 |
| N | 5.805348 | -0.207236 | -1.300272 |
| S | 4.339478 | -2.422978 | -1.026410 |
| H | 5.652423 | -2.680659 | -1.201816 |

HF=-1232.0678667

**xyz coordinates of imino-thiol tautomeric structure (T-3)**

|   |           |           |           |
|---|-----------|-----------|-----------|
| C | -0.447063 | -1.529046 | -0.511933 |
| C | -2.739151 | -1.184866 | -0.164070 |
| C | -2.572292 | 0.203292  | -0.206327 |
| C | -0.149663 | -0.203734 | -0.565411 |
| H | -4.089486 | -2.842204 | 0.061945  |
| H | 0.295211  | -2.309665 | -0.625674 |
| C | -3.996643 | -1.761312 | 0.035233  |
| C | -3.705014 | 1.019055  | -0.043229 |
| C | -4.969487 | 0.477743  | 0.156623  |
| C | -5.093969 | -0.928494 | 0.192831  |
| H | -3.551336 | 2.093543  | -0.080169 |
| H | -6.074905 | -1.371711 | 0.347961  |
| C | -6.185986 | 1.356224  | 0.330831  |
| H | -6.935508 | 1.159073  | -0.445674 |
| H | -6.671305 | 1.179900  | 1.298852  |
| H | -5.920547 | 2.416006  | 0.277991  |
| C | -1.230660 | 0.790536  | -0.417634 |
| O | -1.038137 | 2.004277  | -0.464365 |
| O | -1.676394 | -2.043264 | -0.318990 |
| C | 1.211284  | 0.283839  | -0.778954 |
| H | 1.329693  | 1.362171  | -0.889095 |
| N | 2.224674  | -0.510444 | -0.834610 |
| C | 4.458105  | -0.630115 | -1.103773 |
| N | 5.715138  | -0.142238 | -1.378273 |
| H | 6.478836  | -0.702431 | -1.009492 |
| N | 5.904586  | 1.242536  | -1.498299 |
| H | 6.193417  | 1.650180  | -0.609382 |
| H | 6.624562  | 1.406367  | -2.195594 |
| N | 3.423560  | 0.140934  | -1.049922 |
| S | 4.469696  | -2.415896 | -0.870758 |
| H | 3.145005  | -2.391960 | -0.582206 |

HF=-1232.0622226

**xyz coordinates of structure S-1**

|    |          |           |           |
|----|----------|-----------|-----------|
| C  | 1.129938 | 0.537659  | 0.418257  |
| C  | 2.881038 | 1.952482  | -0.209604 |
| C  | 3.730109 | 0.860558  | -0.463193 |
| C  | 1.861148 | -0.628211 | 0.206491  |
| H  | 2.599073 | 4.082944  | -0.176087 |
| H  | 0.099580 | 0.541961  | 0.763711  |
| C  | 3.285395 | 3.268854  | -0.382975 |
| C  | 5.039672 | 1.130077  | -0.910290 |
| C  | 5.483695 | 2.436918  | -1.096652 |
| C  | 4.584085 | 3.495324  | -0.825174 |
| H  | 5.698155 | 0.291147  | -1.107253 |
| H  | 4.916463 | 4.520041  | -0.966088 |
| C  | 6.880886 | 2.735634  | -1.573594 |
| H  | 6.859622 | 3.304289  | -2.510396 |
| H  | 7.421181 | 3.344527  | -0.839530 |
| H  | 7.453734 | 1.820989  | -1.743984 |
| C  | 3.255155 | -0.495124 | -0.265008 |
| O  | 4.002831 | -1.478693 | -0.487626 |
| O  | 1.582925 | 1.743970  | 0.231797  |
| C  | 1.118156 | -1.829559 | 0.490015  |
| H  | 0.097731 | -1.659042 | 0.827106  |
| N  | 1.406626 | -3.107469 | 0.430291  |
| N  | 2.660908 | -3.525098 | 0.022138  |
| H  | 3.367792 | -2.694687 | -0.239132 |
| C  | 2.916538 | -4.831212 | -0.026019 |
| S  | 1.765240 | -6.084960 | 0.395407  |
| N  | 4.116743 | -5.266221 | -0.415392 |
| H  | 4.862141 | -4.624912 | -0.683752 |
| N  | 4.293557 | -6.650241 | -0.435260 |
| H  | 4.482434 | -6.989343 | -1.377654 |
| H  | 5.017168 | -6.943905 | 0.219658  |
| Cu | 0.300160 | -4.565793 | 0.842737  |

HF=-2871. 8120881

**xyz coordinates of structure S-2**

|   |          |           |           |
|---|----------|-----------|-----------|
| C | 0.449168 | -1.433912 | -0.278296 |
| C | 2.706222 | -1.423704 | 0.366182  |
| C | 2.478936 | -0.436807 | 1.346055  |
| C | 0.076164 | -0.500747 | 0.655681  |

|    |           |           |           |
|----|-----------|-----------|-----------|
| H  | 4.104413  | -2.732642 | -0.633298 |
| H  | -0.225813 | -1.865347 | -1.014511 |
| C  | 3.977909  | -1.976038 | 0.134160  |
| C  | 3.563833  | -0.001316 | 2.100611  |
| C  | 4.863841  | -0.535948 | 1.898841  |
| C  | 5.038377  | -1.528280 | 0.903424  |
| H  | 3.394536  | 0.760144  | 2.856705  |
| H  | 6.026541  | -1.947145 | 0.740678  |
| C  | 6.017356  | -0.041953 | 2.711013  |
| H  | 6.853595  | -0.745182 | 2.706106  |
| H  | 6.385360  | 0.909945  | 2.296109  |
| H  | 5.722977  | 0.163348  | 3.745765  |
| C  | 1.119139  | 0.109100  | 1.543122  |
| O  | 0.834224  | 0.978014  | 2.349306  |
| O  | 1.686010  | -1.882769 | -0.422760 |
| C  | -1.257286 | -0.013925 | 0.802545  |
| H  | -1.367128 | 0.870969  | 1.433925  |
| N  | -2.306696 | -0.568779 | 0.238313  |
| N  | -3.490719 | 0.106347  | 0.394356  |
| H  | -3.470770 | 0.977855  | 0.926739  |
| C  | -4.756430 | -0.277400 | 0.020425  |
| S  | -6.027322 | 0.628665  | 0.636032  |
| N  | -5.046604 | -1.388893 | -0.741998 |
| H  | -6.046525 | -1.470570 | -0.917783 |
| N  | -4.214206 | -1.994967 | -1.760593 |
| H  | -4.656380 | -2.895590 | -1.969252 |
| H  | -4.268229 | -1.442526 | -2.626215 |
| Cu | -2.542081 | -2.052289 | -0.835139 |

HF=-2871.7707795

**xyz coordinates of structure S-3**

|   |           |           |           |
|---|-----------|-----------|-----------|
| C | 0.429890  | -1.323066 | 0.016125  |
| C | 2.771379  | -1.088411 | 0.046852  |
| C | 2.683739  | 0.319367  | -0.002224 |
| C | 0.201804  | 0.024364  | -0.034146 |
| H | 4.024176  | -2.848748 | 0.132722  |
| H | -0.341945 | -2.083371 | 0.028505  |
| C | 4.010086  | -1.764494 | 0.092880  |
| C | 3.864827  | 1.049697  | -0.003556 |
| C | 5.130848  | 0.404295  | 0.040418  |
| C | 5.168879  | -1.013825 | 0.090794  |
| H | 3.802778  | 2.133627  | -0.039060 |
| H | 6.130553  | -1.515877 | 0.129608  |
| C | 6.390098  | 1.206632  | 0.006310  |
| H | 7.230516  | 0.667645  | 0.451759  |
| H | 6.663304  | 1.424202  | -1.039104 |

|    |           |           |           |
|----|-----------|-----------|-----------|
| H  | 6.270238  | 2.172759  | 0.506511  |
| C  | 1.352668  | 0.967297  | -0.045574 |
| O  | 1.192836  | 2.179365  | -0.088722 |
| O  | 1.657224  | -1.858256 | 0.054882  |
| C  | -1.125174 | 0.605071  | -0.079627 |
| H  | -1.151334 | 1.699387  | -0.110967 |
| N  | -2.186557 | -0.131024 | -0.086370 |
| N  | -3.373911 | 0.534776  | -0.124413 |
| H  | -3.362618 | 1.556159  | -0.176350 |
| C  | -4.546692 | -0.136452 | -0.088317 |
| S  | -4.553938 | -1.841235 | 0.087378  |
| N  | -5.652251 | 0.664511  | -0.193337 |
| H  | -5.573813 | 1.667224  | -0.333550 |
| N  | -6.966703 | 0.129849  | -0.137059 |
| H  | -7.467894 | 0.598173  | 0.626383  |
| H  | -7.451384 | 0.382239  | -1.005984 |
| Cu | -6.694761 | -1.784454 | 0.064102  |

HF=-2871.7888185

**xyz coordinates of structure S-4**

|   |           |           |           |
|---|-----------|-----------|-----------|
| C | 0.460534  | -1.293064 | 0.615744  |
| C | 2.790841  | -1.023142 | 0.431706  |
| C | 2.654600  | 0.269935  | -0.116499 |
| C | 0.184603  | -0.057483 | 0.089456  |
| H | 4.101189  | -2.616663 | 1.079125  |
| H | -0.283901 | -2.002922 | 0.956840  |
| C | 4.050527  | -1.618741 | 0.655784  |
| C | 3.810802  | 0.968949  | -0.437828 |
| C | 5.098852  | 0.402985  | -0.224534 |
| C | 5.184332  | -0.901679 | 0.325480  |
| H | 3.713636  | 1.964457  | -0.861589 |
| H | 6.162041  | -1.344241 | 0.488486  |
| C | 6.329286  | 1.181918  | -0.555352 |
| H | 6.585270  | 1.845452  | 0.286775  |
| H | 7.191558  | 0.532477  | -0.727051 |
| H | 6.179604  | 1.827039  | -1.427031 |
| C | 1.301576  | 0.832564  | -0.330512 |
| O | 1.095229  | 1.935675  | -0.818009 |
| O | 1.702506  | -1.756286 | 0.771812  |
| C | -1.161006 | 0.450701  | -0.066707 |
| H | -1.224537 | 1.485249  | -0.411973 |
| N | -2.185543 | -0.297177 | 0.183257  |
| N | -3.460208 | 0.293785  | 0.035854  |
| H | -4.101630 | -0.402026 | 0.437598  |
| C | -3.768179 | 1.580973  | 0.766483  |



|    |           |          |           |
|----|-----------|----------|-----------|
| S  | -2.932380 | 2.161899 | 2.024278  |
| N  | -4.974247 | 2.095427 | 0.328501  |
| H  | -5.295537 | 2.920635 | 0.831294  |
| N  | -5.359023 | 2.028056 | -1.059901 |
| H  | -6.358878 | 1.802148 | -1.093112 |
| H  | -5.262921 | 2.962460 | -1.476909 |
| Cu | -4.160905 | 0.666181 | -1.706925 |

HF=-2871.7460291

**xyz coordinates of structure S-5**

|    |           |           |           |
|----|-----------|-----------|-----------|
| C  | -1.476083 | -2.443683 | 0.001397  |
| C  | -3.423354 | -1.154488 | 0.000948  |
| C  | -2.678219 | 0.041018  | 0.000075  |
| C  | -0.623145 | -1.345184 | 0.000677  |
| H  | -5.347745 | -2.112273 | 0.001901  |
| H  | -1.124602 | -3.471440 | 0.001921  |
| C  | -4.812321 | -1.168965 | 0.001209  |
| C  | -3.386555 | 1.262505  | -0.000588 |
| C  | -4.776965 | 1.288347  | -0.000372 |
| C  | -5.472415 | 0.052923  | 0.000548  |
| H  | -2.819479 | 2.186659  | -0.001275 |
| H  | -6.558849 | 0.060063  | 0.000737  |
| C  | -5.543072 | 2.584863  | -0.001016 |
| H  | -6.191398 | 2.652850  | -0.882244 |
| H  | -6.190095 | 2.654452  | 0.881052  |
| H  | -4.875137 | 3.449388  | -0.002281 |
| C  | -1.237309 | -0.008374 | -0.000034 |
| O  | -0.571572 | 1.076031  | -0.000671 |
| O  | -2.778014 | -2.375704 | 0.001574  |
| C  | 0.780837  | -1.695193 | 0.000503  |
| H  | 0.996048  | -2.768408 | 0.000321  |
| N  | 1.796776  | -0.870904 | 0.000812  |
| N  | 3.104595  | -1.350975 | -0.000338 |
| H  | 3.761727  | -0.580561 | 0.002578  |
| C  | 3.628925  | -2.608448 | -0.001869 |
| S  | 2.805887  | -4.107046 | -0.006939 |
| N  | 4.969572  | -2.700964 | 0.000351  |
| H  | 5.600823  | -1.901698 | 0.003512  |
| N  | 5.459926  | -4.008055 | -0.002558 |
| H  | 5.986777  | -4.219852 | -0.849129 |
| H  | 5.983663  | -4.224768 | 0.844698  |
| Cu | 1.246343  | 0.888071  | -0.000098 |

HF=-2871.7917997

**xyz coordinates of Isomer 1 for Co(II) complex**

|   |            |           |           |
|---|------------|-----------|-----------|
| C | -5.039523  | -2.098653 | -0.190691 |
| C | -7.203976  | -1.455716 | 0.394091  |
| C | -6.843345  | -0.105043 | 0.340794  |
| C | -4.545828  | -0.820294 | -0.278384 |
| H | -8.735123  | -2.921101 | 0.752538  |
| H | -4.428799  | -2.977139 | -0.371988 |
| C | -8.497026  | -1.863314 | 0.721375  |
| C | -7.829906  | 0.858397  | 0.629077  |
| C | -9.127840  | 0.489295  | 0.959099  |
| C | -9.442485  | -0.888717 | 0.999880  |
| H | -7.542160  | 1.903539  | 0.585934  |
| H | -10.453329 | -1.194114 | 1.257129  |
| C | -10.187163 | 1.518605  | 1.269364  |
| H | -11.031537 | 1.438719  | 0.574441  |
| H | -10.587574 | 1.381207  | 2.280791  |
| H | -9.789382  | 2.534668  | 1.200199  |
| C | -5.473009  | 0.292722  | -0.003232 |
| O | -5.164867  | 1.497782  | -0.051511 |
| O | -6.283532  | -2.441597 | 0.122026  |
| C | -3.117761  | -0.776521 | -0.638212 |
| H | -2.695138  | -1.762564 | -0.816983 |
| N | -2.224377  | 0.148431  | -0.756332 |
| N | -2.557977  | 1.461389  | -0.563130 |
| H | -3.559988  | 1.654684  | -0.357966 |
| C | -1.635155  | 2.462353  | -0.467044 |
| S | 0.045507   | 2.322731  | -0.716356 |
| N | -2.212748  | 3.644371  | -0.131302 |
| H | -3.188598  | 3.640927  | 0.156220  |
| N | -1.454658  | 4.803402  | 0.020665  |
| H | -1.883259  | 5.559809  | -0.506232 |
| H | -1.394264  | 5.056919  | 1.004930  |
| N | 2.199847   | -0.147479 | -0.601791 |
| S | -0.039712  | -2.355642 | -0.640167 |
| C | 3.090092   | 0.780045  | -0.490332 |
| N | 2.547621   | -1.459884 | -0.441587 |
| C | 1.642160   | -2.476923 | -0.393906 |
| C | 4.530184   | 0.824489  | -0.178452 |
| H | 2.658942   | 1.766781  | -0.639246 |
| H | 3.553987   | -1.649507 | -0.255616 |
| N | 2.235599   | -3.661872 | -0.094631 |
| C | 5.025455   | 2.103234  | -0.111754 |

|    |           |           |           |
|----|-----------|-----------|-----------|
| C  | 5.468075  | -0.286191 | 0.067363  |
| O  | 5.160614  | -1.492107 | 0.036241  |
| H  | 3.211021  | -3.654879 | 0.193754  |
| N  | 1.498706  | -4.840454 | -0.003307 |
| H  | 4.407818  | 2.980396  | -0.274651 |
| O  | 6.280084  | 2.449100  | 0.154719  |
| C  | 6.849595  | 0.114225  | 0.360838  |
| H  | 1.942341  | -5.562138 | -0.565483 |
| H  | 1.440696  | -5.143986 | 0.966767  |
| C  | 7.210693  | 1.465281  | 0.395535  |
| C  | 7.847098  | -0.847366 | 0.615864  |
| C  | 8.515034  | 1.874834  | 0.672416  |
| C  | 9.156214  | -0.476254 | 0.895288  |
| H  | 7.558645  | -1.892820 | 0.587241  |
| H  | 8.753232  | 2.932915  | 0.690375  |
| C  | 9.471167  | 0.902098  | 0.918669  |
| C  | 10.227384 | -1.503810 | 1.168779  |
| H  | 10.490823 | 1.209180  | 1.136138  |
| H  | 11.042657 | -1.428742 | 0.439376  |
| H  | 10.668833 | -1.360174 | 2.162100  |
| H  | 9.827036  | -2.520180 | 1.122301  |
| Co | 0.003188  | -0.000564 | -0.678518 |
| Cl | -0.070183 | 0.036128  | 1.492430  |
| O  | 0.067282  | -0.032610 | -2.574630 |
| H  | -0.238107 | 0.756034  | -3.057128 |
| H  | -0.255987 | -0.821350 | -3.045315 |

HF=-4383.3420226

**xyz coordinates of Isomer 2 for Co(II) complex**

|   |           |          |           |
|---|-----------|----------|-----------|
| C | -2.014235 | 2.703316 | 0.165596  |
| C | -4.016926 | 3.899661 | 0.178372  |
| C | -4.750221 | 2.715215 | 0.052752  |
| C | -2.598360 | 1.468384 | 0.043041  |
| H | -4.031306 | 6.042831 | 0.347538  |
| H | -0.939093 | 2.839895 | 0.217226  |
| C | -4.636175 | 5.147603 | 0.250733  |
| C | -6.155005 | 2.804962 | -0.001639 |
| C | -6.805723 | 4.030392 | 0.066558  |
| C | -6.020150 | 5.199214 | 0.194139  |
| H | -6.715297 | 1.881155 | -0.099968 |
| H | -6.513775 | 6.165991 | 0.248937  |
| C | -8.310498 | 4.130219 | 0.006419  |
| H | -8.712396 | 4.601458 | 0.911234  |
| H | -8.632313 | 4.740825 | -0.845560 |
| H | -8.772539 | 3.144322 | -0.093102 |
| C | -4.072148 | 1.414548 | -0.022592 |

|   |           |           |           |
|---|-----------|-----------|-----------|
| O | -4.737146 | 0.369991  | -0.133467 |
| O | -2.642705 | 3.873829  | 0.234715  |
| C | -1.623365 | 0.364847  | -0.017984 |
| H | -0.587734 | 0.691495  | 0.027957  |
| N | -1.701883 | -0.917775 | -0.130948 |
| N | -2.898623 | -1.557461 | -0.219594 |
| H | -3.741647 | -0.953029 | -0.189300 |
| C | -3.018920 | -2.910360 | -0.441274 |
| S | -1.754112 | -4.028351 | -0.502906 |
| N | -4.322316 | -3.259627 | -0.616605 |
| H | -5.018550 | -2.523061 | -0.700908 |
| N | -4.689825 | -4.584564 | -0.832596 |
| H | -5.410872 | -4.854130 | -0.168688 |
| H | -5.027006 | -4.708253 | -1.784795 |
| N | 1.452096  | -0.822763 | -0.103838 |
| S | -0.145508 | -2.659851 | 1.792453  |
| C | 2.213350  | -0.287843 | -1.000335 |
| N | 1.816701  | -0.830300 | 1.224014  |
| C | 1.148831  | -1.574984 | 2.145786  |
| C | 3.528859  | 0.371346  | -0.997124 |
| H | 1.764036  | -0.400997 | -1.986854 |
| N | 1.599787  | -1.382365 | 3.409764  |
| C | 4.006345  | 0.633373  | -2.258407 |
| C | 4.349694  | 0.794573  | 0.150432  |
| H | 2.361428  | -0.726599 | 3.567454  |
| N | 1.090564  | -2.129056 | 4.469953  |
| H | 3.460782  | 0.369123  | -3.158518 |
| O | 5.161041  | 1.220560  | -2.552897 |
| C | 5.623503  | 1.436401  | -0.193962 |
| O | 4.021904  | 0.648560  | 1.343637  |
| H | 1.826941  | -2.690409 | 4.891745  |
| H | 0.683122  | -1.511642 | 5.167792  |
| C | 5.988585  | 1.626071  | -1.531775 |
| C | 6.511949  | 1.877422  | 0.806727  |
| C | 7.193560  | 2.230956  | -1.889892 |
| C | 7.720626  | 2.482601  | 0.486843  |
| H | 6.220806  | 1.727467  | 1.841088  |
| H | 7.439168  | 2.359013  | -2.938659 |
| C | 8.044386  | 2.650918  | -0.879588 |
| C | 8.676038  | 2.953305  | 1.556167  |
| H | 8.986465  | 3.122433  | -1.146800 |
| H | 9.644460  | 2.446017  | 1.472029  |
| H | 8.867316  | 4.029481  | 1.469915  |
| H | 8.281480  | 2.760704  | 2.557528  |
| H | 2.665089  | -0.281411 | 1.476715  |
| O | 1.117069  | -3.601789 | -0.437571 |
| H | 1.092042  | -4.407057 | 0.112165  |
| H | 1.254066  | -3.877495 | -1.369459 |

|    |           |           |           |
|----|-----------|-----------|-----------|
| Co | -0.134956 | -2.409623 | -0.301380 |
| Cl | -0.123397 | -2.152456 | -2.445443 |

HF=-4383.3093483

**xyz coordinates of Isomer 3 for Co(II) complex**

|   |           |           |           |
|---|-----------|-----------|-----------|
| C | 2.609305  | 1.974291  | -1.770315 |
| C | 4.569879  | 3.155776  | -1.315136 |
| C | 4.910479  | 2.249495  | -0.305008 |
| C | 2.827787  | 0.997594  | -0.831318 |
| H | 5.078565  | 4.927180  | -2.422063 |
| H | 1.731412  | 1.989995  | -2.408577 |
| C | 5.378149  | 4.247395  | -1.631606 |
| C | 6.107509  | 2.464104  | 0.405704  |
| C | 6.937526  | 3.540480  | 0.117595  |
| C | 6.550685  | 4.426892  | -0.914054 |
| H | 6.361990  | 1.757805  | 1.188983  |
| H | 7.189063  | 5.273752  | -1.151813 |
| C | 8.222609  | 3.771578  | 0.874436  |
| H | 9.087982  | 3.741886  | 0.201658  |
| H | 8.224562  | 4.754932  | 1.359277  |
| H | 8.372354  | 3.014311  | 1.648709  |
| C | 4.041996  | 1.105582  | 0.001530  |
| O | 4.337268  | 0.317534  | 0.915983  |
| O | 3.406974  | 3.003570  | -2.036471 |
| C | 1.756985  | -0.010950 | -0.764424 |
| H | 0.859838  | 0.268614  | -1.311674 |
| N | 1.642453  | -1.184791 | -0.223261 |
| N | 2.706487  | -1.721978 | 0.433844  |
| H | 3.435788  | -1.066480 | 0.777507  |
| C | 2.634820  | -3.038041 | 0.756720  |
| S | 1.345727  | -3.964066 | 0.185947  |
| N | 3.642204  | -3.488772 | 1.533031  |
| H | 4.251592  | -2.803908 | 1.975319  |
| N | 3.681043  | -4.821377 | 1.942803  |
| H | 4.627201  | -5.177301 | 1.841677  |
| H | 3.375718  | -4.903166 | 2.910834  |
| N | -1.454214 | -0.898180 | -0.510914 |
| S | -1.821549 | -3.676422 | -0.107467 |
| C | -1.489053 | 0.239856  | 0.104137  |
| N | -2.625351 | -1.355633 | -1.088109 |
| C | -2.904860 | -2.672508 | -0.940172 |
| C | -2.561345 | 1.196743  | 0.416667  |
| H | -0.535138 | 0.481395  | 0.562021  |
| N | -4.097404 | -3.056445 | -1.456350 |
| C | -2.280613 | 1.996063  | 1.497011  |

|    |           |           |           |
|----|-----------|-----------|-----------|
| C  | -3.828683 | 1.419264  | -0.299905 |
| H  | -4.716480 | -2.339300 | -1.828193 |
| N  | -4.552908 | -4.365707 | -1.312869 |
| H  | -1.366149 | 1.903457  | 2.074172  |
| O  | -3.065755 | 2.946739  | 1.988633  |
| C  | -4.676387 | 2.484022  | 0.249467  |
| O  | -4.181694 | 0.785499  | -1.311581 |
| H  | -5.338778 | -4.400651 | -0.667011 |
| H  | -4.831694 | -4.733092 | -2.218598 |
| C  | -4.273035 | 3.205836  | 1.378532  |
| C  | -5.916960 | 2.802842  | -0.336227 |
| C  | -5.061892 | 4.214796  | 1.930671  |
| C  | -6.728530 | 3.802271  | 0.186205  |
| H  | -6.220310 | 2.239743  | -1.212769 |
| H  | -4.713978 | 4.749653  | 2.807879  |
| C  | -6.278282 | 4.500784  | 1.330297  |
| C  | -8.059743 | 4.144873  | -0.436842 |
| H  | -6.902054 | 5.284563  | 1.751970  |
| H  | -8.880140 | 3.990363  | 0.274082  |
| H  | -8.093488 | 5.196641  | -0.744616 |
| H  | -8.258175 | 3.529647  | -1.318552 |
| H  | -3.328048 | -0.635242 | -1.346261 |
| Cl | -0.079926 | -2.010159 | 1.900954  |
| Co | -0.067846 | -2.415582 | -0.166027 |
| O  | -0.057306 | -2.797853 | -2.115773 |
| H  | -0.476632 | -3.661585 | -2.289651 |
| H  | 0.826594  | -2.849956 | -2.520824 |

HF=-4383.2941792

**xyz coordinates of Isomer 4 for Co(II) complex**

|   |           |           |           |
|---|-----------|-----------|-----------|
| C | -4.454887 | -0.342716 | 1.658180  |
| C | -6.080446 | 1.242611  | 1.122764  |
| C | -5.220207 | 1.851428  | 0.202763  |
| C | -3.518921 | 0.131779  | 0.769626  |
| H | -8.006639 | 1.215628  | 2.076585  |
| H | -4.273862 | -1.200576 | 2.297571  |
| C | -7.370809 | 1.717952  | 1.355503  |
| C | -5.686716 | 2.981855  | -0.496431 |
| C | -6.965537 | 3.483884  | -0.289848 |
| C | -7.798500 | 2.830353  | 0.647648  |
| H | -5.011872 | 3.450572  | -1.205030 |
| H | -8.802074 | 3.210228  | 0.820097  |
| C | -7.470254 | 4.692394  | -1.039830 |
| H | -8.342644 | 4.439887  | -1.654398 |

|   |           |           |           |
|---|-----------|-----------|-----------|
| H | -7.780875 | 5.485265  | -0.349332 |
| H | -6.701315 | 5.102749  | -1.699997 |
| C | -3.872014 | 1.319762  | -0.027918 |
| O | -3.105213 | 1.878759  | -0.835672 |
| O | -5.674498 | 0.144043  | 1.845506  |
| C | -2.266839 | -0.639748 | 0.811570  |
| H | -2.164394 | -1.247418 | 1.703197  |
| N | -1.287151 | -0.833772 | -0.020887 |
| N | -1.363279 | -0.079221 | -1.198226 |
| H | -1.936662 | 0.787498  | -1.165377 |
| C | -0.836106 | -0.557429 | -2.349837 |
| S | 0.025779  | -2.014343 | -2.401674 |
| N | -1.094136 | 0.226991  | -3.430677 |
| H | -1.829119 | 0.925560  | -3.341761 |
| N | -0.663524 | -0.157860 | -4.702233 |
| H | -1.427409 | -0.583713 | -5.225467 |
| H | -0.325232 | 0.661618  | -5.198761 |
| N | 1.520287  | -1.021807 | 0.013795  |
| S | -0.205320 | -2.583256 | 1.802310  |
| C | 2.426561  | -0.608073 | -0.814220 |
| N | 1.657282  | -0.721213 | 1.351568  |
| C | 0.885598  | -1.364112 | 2.265676  |
| C | 3.678725  | 0.154641  | -0.701442 |
| H | 2.192546  | -0.919554 | -1.829126 |
| N | 1.080929  | -0.936167 | 3.538510  |
| C | 4.380073  | 0.194930  | -1.883564 |
| C | 4.246979  | 0.869626  | 0.457202  |
| H | 1.823352  | -0.262703 | 3.715255  |
| N | 0.437009  | -1.556033 | 4.609316  |
| H | 4.028500  | -0.287134 | -2.790124 |
| O | 5.544405  | 0.796775  | -2.084485 |
| C | 5.538274  | 1.524563  | 0.216706  |
| O | 3.702892  | 0.948514  | 1.573936  |
| H | 1.102495  | -2.096652 | 5.159015  |
| H | 0.002850  | -0.849872 | 5.197658  |
| C | 6.146798  | 1.464743  | -1.041757 |
| C | 6.200444  | 2.227197  | 1.242447  |
| C | 7.374584  | 2.073279  | -1.299410 |
| C | 7.425714  | 2.844651  | 1.023003  |
| H | 5.721650  | 2.270333  | 2.215043  |
| H | 7.812331  | 2.003188  | -2.289385 |
| C | 7.999619  | 2.754304  | -0.266177 |
| C | 8.139787  | 3.594824  | 2.120626  |
| H | 8.957724  | 3.231536  | -0.454472 |
| H | 9.123302  | 3.154975  | 2.324224  |
| H | 8.306328  | 4.641622  | 1.840418  |
| H | 7.566481  | 3.582463  | 3.051508  |
| H | 2.394289  | -0.032627 | 1.611833  |

|    |           |           |           |
|----|-----------|-----------|-----------|
| O  | 1.163678  | -3.842479 | -0.539997 |
| H  | 1.420567  | -4.248752 | 0.308367  |
| H  | 0.582105  | -4.511397 | -0.956131 |
| Co | -0.090831 | -2.301907 | -0.275603 |
| Cl | -1.857699 | -3.689246 | -0.590144 |

HF=-4383.2981814

**xyz coordinates of Isomer 5 for Co(II) complex**

|   |            |           |           |
|---|------------|-----------|-----------|
| C | -4.600137  | -1.896183 | -1.266347 |
| C | -6.879970  | -1.507913 | -0.961703 |
| C | -6.618182  | -0.233603 | -0.447607 |
| C | -4.191756  | -0.678431 | -0.770511 |
| H | -8.337605  | -2.996419 | -1.491038 |
| H | -3.901251  | -2.643458 | -1.627448 |
| C | -8.178165  | -2.002401 | -1.087195 |
| C | -7.712213  | 0.561583  | -0.052172 |
| C | -9.018345  | 0.102046  | -0.162337 |
| C | -9.230528  | -1.194193 | -0.686741 |
| H | -7.500947  | 1.549490  | 0.343323  |
| H | -10.246697 | -1.568390 | -0.779795 |
| C | -10.192589 | 0.949519  | 0.262955  |
| H | -10.889294 | 1.106338  | -0.568909 |
| H | -10.756842 | 0.466431  | 1.069633  |
| H | -9.868505  | 1.930737  | 0.620237  |
| C | -5.241233  | 0.256786  | -0.324579 |
| O | -5.025071  | 1.400046  | 0.123426  |
| O | -5.852118  | -2.325252 | -1.369108 |
| C | -2.728471  | -0.531722 | -0.814316 |
| H | -2.225055  | -1.353574 | -1.312605 |
| N | -1.856095  | 0.316827  | -0.340799 |
| N | -2.397558  | 1.412054  | 0.329216  |
| H | -3.434811  | 1.530827  | 0.308594  |
| C | -1.579270  | 2.295961  | 0.933659  |
| S | 0.095194   | 2.076858  | 0.868377  |
| N | -2.215030  | 3.301795  | 1.581189  |
| H | -3.229964  | 3.272415  | 1.646529  |
| N | -1.496965  | 4.282748  | 2.263108  |
| H | -1.781353  | 5.203499  | 1.938622  |
| H | -1.659643  | 4.204658  | 3.264721  |
| N | 1.925163   | 0.006654  | -0.049706 |
| S | -0.220714  | -0.859621 | 1.622836  |
| C | 2.846411   | 0.567329  | -0.775456 |
| N | 2.328623   | -0.840679 | 0.955963  |
| C | 1.389838   | -1.340213 | 1.792128  |
| C | 4.318364   | 0.533351  | -0.807104 |



|    |           |           |           |
|----|-----------|-----------|-----------|
| H  | 2.413033  | 1.231583  | -1.515265 |
| H  | 3.324799  | -1.146786 | 0.956848  |
| N  | 1.862196  | -2.198720 | 2.724140  |
| C  | 4.855695  | 1.474167  | -1.651261 |
| C  | 5.256059  | -0.369196 | -0.111198 |
| O  | 4.915591  | -1.282825 | 0.662128  |
| H  | 2.841428  | -2.470831 | 2.683955  |
| N  | 1.000998  | -2.813206 | 3.631490  |
| H  | 4.244533  | 2.169041  | -2.217628 |
| O  | 6.146848  | 1.674555  | -1.893606 |
| C  | 6.677845  | -0.137187 | -0.393823 |
| H  | 0.956857  | -3.813760 | 3.449928  |
| H  | 1.328681  | -2.647822 | 4.579698  |
| C  | 7.077874  | 0.876390  | -1.270664 |
| C  | 7.676257  | -0.927818 | 0.208519  |
| C  | 8.421537  | 1.120206  | -1.555153 |
| C  | 9.023998  | -0.713898 | -0.051230 |
| H  | 7.357100  | -1.714207 | 0.884368  |
| H  | 8.689517  | 1.916077  | -2.241735 |
| C  | 9.377608  | 0.324624  | -0.943454 |
| C  | 10.096086 | -1.558150 | 0.593680  |
| H  | 10.427855 | 0.504426  | -1.157811 |
| H  | 10.714078 | -2.057641 | -0.161741 |
| H  | 10.767817 | -0.944602 | 1.205917  |
| H  | 9.663818  | -2.328746 | 1.237686  |
| O  | 0.273101  | 1.116350  | -1.894528 |
| H  | -0.373230 | 1.805371  | -2.125361 |
| H  | 0.202639  | 0.420360  | -2.580078 |
| Co | 0.034534  | 0.161739  | -0.195255 |
| Cl | -0.026911 | -1.778198 | -1.272670 |

HF=-4383.3014938

**xyz coordinates of Isomer 1 for Ni(II) complex**

|   |           |           |           |
|---|-----------|-----------|-----------|
| C | -5.064359 | -2.082021 | -0.287599 |
| C | -7.233829 | -1.440824 | 0.280587  |
| C | -6.855089 | -0.094372 | 0.307751  |
| C | -4.553998 | -0.807388 | -0.300116 |
| H | -8.791778 | -2.901595 | 0.524029  |
| H | -4.460048 | -2.958240 | -0.498918 |
| C | -8.539488 | -1.847097 | 0.555003  |
| C | -7.835773 | 0.865981  | 0.624658  |
| C | -9.145906 | 0.498075  | 0.904151  |
| C | -9.478995 | -0.875536 | 0.862971  |
| H | -7.533631 | 1.907771  | 0.644027  |

|   |            |           |           |
|---|------------|-----------|-----------|
| H | -10.499614 | -1.180136 | 1.079331  |
| C | -10.198794 | 1.524046  | 1.245708  |
| H | -11.033514 | 1.485546  | 0.535832  |
| H | -10.615615 | 1.345122  | 2.243979  |
| H | -9.789165  | 2.537621  | 1.229177  |
| C | -5.472368  | 0.302441  | 0.015428  |
| O | -5.147229  | 1.503327  | 0.041376  |
| O | -6.319297  | -2.423888 | -0.020984 |
| C | -3.118215  | -0.763214 | -0.625400 |
| H | -2.695219  | -1.745768 | -0.820206 |
| N | -2.221873  | 0.161930  | -0.703422 |
| N | -2.541497  | 1.471275  | -0.485377 |
| H | -3.539011  | 1.666837  | -0.263193 |
| C | -1.607470  | 2.463949  | -0.379125 |
| S | 0.061622   | 2.322086  | -0.669897 |
| N | -2.174679  | 3.641813  | -0.009717 |
| H | -3.142059  | 3.633942  | 0.304667  |
| N | -1.405029  | 4.790382  | 0.162244  |
| H | -1.840786  | 5.566126  | -0.329321 |
| H | -1.318986  | 5.011172  | 1.152590  |
| N | 2.201450   | -0.161801 | -0.582174 |
| S | -0.051900  | -2.355991 | -0.614476 |
| C | 3.094015   | 0.766526  | -0.511435 |
| N | 2.535053   | -1.470546 | -0.388495 |
| C | 1.618212   | -2.479239 | -0.322578 |
| C | 4.538213   | 0.812275  | -0.223269 |
| H | 2.663989   | 1.749254  | -0.685850 |
| H | 3.536869   | -1.661355 | -0.181660 |
| N | 2.199924   | -3.658442 | 0.021609  |
| C | 5.046901   | 2.087448  | -0.229070 |
| C | 5.466778   | -0.294580 | 0.071231  |
| O | 5.144856   | -1.496063 | 0.112608  |
| H | 3.165122   | -3.645175 | 0.342128  |
| N | 1.450663   | -4.826627 | 0.141810  |
| H | 4.435798   | 2.961843  | -0.427707 |
| O | 6.308629   | 2.432514  | 0.001325  |
| C | 6.856625   | 0.105285  | 0.323466  |
| H | 1.904792   | -5.574728 | -0.375455 |
| H | 1.360740   | -5.087622 | 1.121903  |
| C | 7.232553   | 1.452034  | 0.280185  |
| C | 7.847335   | -0.852657 | 0.615631  |
| C | 8.545251   | 1.860732  | 0.515211  |
| C | 9.164538   | -0.482285 | 0.855478  |
| H | 7.547042   | -1.894685 | 0.647445  |
| H | 8.795216   | 2.915388  | 0.472685  |
| C | 9.494560   | 0.891551  | 0.799391  |
| C | 10.228324  | -1.505821 | 1.169651  |
| H | 10.520699  | 1.198189  | 0.984614  |

|    |           |           |           |
|----|-----------|-----------|-----------|
| H  | 11.041544 | -1.469219 | 0.435136  |
| H  | 10.674417 | -1.322733 | 2.154438  |
| H  | 9.819509  | -2.519876 | 1.169063  |
| Ni | 0.005247  | -0.001067 | -0.642375 |
| Cl | -0.052293 | 0.026056  | 1.529194  |
| O  | 0.055502  | -0.024756 | -2.539024 |
| H  | -0.256055 | 0.748348  | -3.040460 |
| H  | -0.185643 | -0.833450 | -3.023332 |

HF=-4508.8632147

**xyz coordinates of Isomer 2 for Ni(II) complex**

|   |           |           |           |
|---|-----------|-----------|-----------|
| C | -1.739005 | 2.722479  | 0.099152  |
| C | -3.653296 | 4.054011  | 0.162742  |
| C | -4.469794 | 2.920442  | 0.094184  |
| C | -2.409814 | 1.528503  | 0.026648  |
| H | -3.515099 | 6.195920  | 0.284923  |
| H | -0.655882 | 2.785638  | 0.108670  |
| C | -4.182859 | 5.342599  | 0.233637  |
| C | -5.866293 | 3.105374  | 0.098754  |
| C | -6.429095 | 4.373522  | 0.168838  |
| C | -5.561325 | 5.488007  | 0.235944  |
| H | -6.491640 | 2.220428  | 0.045500  |
| H | -5.985152 | 6.487342  | 0.290858  |
| C | -7.924819 | 4.574855  | 0.172522  |
| H | -8.250180 | 5.107308  | 1.074024  |
| H | -8.245313 | 5.172864  | -0.688909 |
| H | -8.456295 | 3.620126  | 0.135182  |
| C | -3.885177 | 1.575279  | 0.018521  |
| O | -4.623826 | 0.577025  | -0.043840 |
| O | -2.282730 | 3.934815  | 0.163677  |
| C | -1.514045 | 0.357950  | -0.036086 |
| H | -0.459223 | 0.618722  | 0.000275  |
| N | -1.676135 | -0.916859 | -0.144604 |
| N | -2.920991 | -1.462915 | -0.224066 |
| H | -3.718170 | -0.800529 | -0.160616 |
| C | -3.148860 | -2.796587 | -0.448844 |
| S | -1.972580 | -4.007835 | -0.562778 |
| N | -4.476905 | -3.054297 | -0.584940 |
| H | -5.125983 | -2.272208 | -0.620609 |
| N | -4.936867 | -4.347847 | -0.812315 |
| H | -5.637596 | -4.592708 | -0.117755 |
| H | -5.328366 | -4.425542 | -1.748334 |
| N | 1.475619  | -1.069701 | -0.124427 |
| S | -0.258277 | -2.804333 | 1.748470  |
| C | 2.204470  | -0.489913 | -1.014960 |

|    |           |           |           |
|----|-----------|-----------|-----------|
| N  | 1.802006  | -1.074958 | 1.205866  |
| C  | 1.092438  | -1.812731 | 2.114791  |
| C  | 3.472624  | 0.256299  | -0.997581 |
| H  | 1.764285  | -0.631007 | -2.003096 |
| N  | 1.578159  | -1.672343 | 3.374062  |
| C  | 3.915008  | 0.598830  | -2.251723 |
| C  | 4.287865  | 0.665953  | 0.158764  |
| H  | 2.394531  | -1.083504 | 3.523270  |
| N  | 1.017380  | -2.362698 | 4.445834  |
| H  | 3.372994  | 0.340509  | -3.155773 |
| O  | 5.028584  | 1.265136  | -2.533214 |
| C  | 5.515581  | 1.399436  | -0.172057 |
| O  | 3.993645  | 0.434890  | 1.346437  |
| H  | 1.703991  | -2.991407 | 4.856120  |
| H  | 0.686543  | -1.705777 | 5.148176  |
| C  | 5.846780  | 1.672742  | -1.504197 |
| C  | 6.392874  | 1.844458  | 0.836261  |
| C  | 7.007908  | 2.364186  | -1.849460 |
| C  | 7.558646  | 2.534929  | 0.529240  |
| H  | 6.128447  | 1.628238  | 1.866075  |
| H  | 7.228706  | 2.555225  | -2.894154 |
| C  | 7.849135  | 2.786229  | -0.831731 |
| C  | 8.502951  | 3.009300  | 1.606745  |
| H  | 8.757382  | 3.324818  | -1.089050 |
| H  | 9.493670  | 2.553552  | 1.492274  |
| H  | 8.640874  | 4.096042  | 1.561864  |
| H  | 8.130599  | 2.757742  | 2.603499  |
| H  | 2.646623  | -0.532187 | 1.477744  |
| O  | 0.923296  | -3.808580 | -0.498687 |
| H  | 0.947066  | -4.591166 | 0.083069  |
| H  | 1.068120  | -4.100211 | -1.423900 |
| Ni | -0.231230 | -2.524165 | -0.341415 |
| Cl | -0.202694 | -2.236400 | -2.481428 |

HF=-4508.8297679

**xyz coordinates of Isomer 3 for Ni(II) complex**

|   |           |          |           |
|---|-----------|----------|-----------|
| C | -2.358963 | 1.787075 | 1.717840  |
| C | -4.327751 | 3.023931 | 1.518071  |
| C | -4.622847 | 2.408181 | 0.296601  |
| C | -2.535973 | 1.087991 | 0.548497  |
| H | -4.898303 | 4.442363 | 3.029117  |
| H | -1.504118 | 1.634664 | 2.368882  |
| C | -5.162280 | 3.990222 | 2.079127  |
| C | -5.799949 | 2.792335 | -0.374985 |

|   |           |           |           |
|---|-----------|-----------|-----------|
| C | -6.654231 | 3.752344  | 0.153277  |
| C | -6.313906 | 4.342508  | 1.392458  |
| H | -6.019480 | 2.312723  | -1.323236 |
| H | -6.972199 | 5.094315  | 1.819818  |
| C | -7.917743 | 4.164408  | -0.561801 |
| H | -8.804407 | 3.943868  | 0.044525  |
| H | -7.924816 | 5.242050  | -0.763174 |
| H | -8.024645 | 3.642616  | -1.516578 |
| C | -3.729939 | 1.386098  | -0.261230 |
| O | -3.989784 | 0.847342  | -1.353519 |
| O | -3.185144 | 2.698459  | 2.214605  |
| C | -1.439154 | 0.151040  | 0.265868  |
| H | -0.545054 | 0.334721  | 0.853373  |
| N | -1.324313 | -0.911101 | -0.466977 |
| N | -2.424270 | -1.289940 | -1.228082 |
| H | -3.101898 | -0.536954 | -1.463644 |
| C | -2.757608 | -2.601111 | -1.128363 |
| S | -1.726259 | -3.628214 | -0.272745 |
| N | -3.931388 | -2.944058 | -1.711195 |
| H | -4.541217 | -2.199307 | -2.041951 |
| N | -4.396964 | -4.256936 | -1.651507 |
| H | -5.192612 | -4.325697 | -1.020449 |
| H | -4.663499 | -4.568681 | -2.581414 |
| N | 1.530472  | -1.161195 | -0.056051 |
| S | 1.412603  | -3.837983 | 0.172259  |
| C | 1.648746  | -0.031244 | -0.690293 |
| N | 2.604166  | -1.601936 | 0.665751  |
| C | 2.620368  | -2.930393 | 0.903105  |
| C | 2.730253  | 0.957190  | -0.817006 |
| H | 0.767757  | 0.198750  | -1.281133 |
| N | 3.603867  | -3.390071 | 1.703899  |
| C | 2.591764  | 1.794309  | -1.895788 |
| C | 3.864895  | 1.194305  | 0.096257  |
| H | 4.117818  | -2.711286 | 2.261535  |
| N | 3.664684  | -4.746410 | 2.027089  |
| H | 1.766643  | 1.717895  | -2.596993 |
| O | 3.415624  | 2.779402  | -2.236342 |
| C | 4.765802  | 2.285217  | -0.296596 |
| O | 4.064782  | 0.554249  | 1.143119  |
| H | 4.630641  | -5.057902 | 1.986622  |
| H | 3.280182  | -4.908622 | 2.956148  |
| C | 4.517368  | 3.036212  | -1.450889 |
| C | 5.900513  | 2.604883  | 0.474128  |
| C | 5.357611  | 4.074710  | -1.851503 |
| C | 6.760199  | 3.632226  | 0.105211  |
| H | 6.082550  | 2.019514  | 1.369336  |
| H | 5.130135  | 4.633308  | -2.753119 |
| C | 6.467702  | 4.359922  | -1.071489 |

|    |           |           |           |
|----|-----------|-----------|-----------|
| C  | 7.979246  | 3.975038  | 0.926289  |
| H  | 7.130263  | 5.166532  | -1.374245 |
| H  | 8.897129  | 3.860002  | 0.337616  |
| H  | 7.944682  | 5.015694  | 1.269702  |
| H  | 8.061597  | 3.332546  | 1.807065  |
| H  | 3.257567  | -0.888274 | 1.043691  |
| Ni | -0.004562 | -2.323058 | -0.157909 |
| Cl | -0.155751 | -2.242798 | 1.950943  |
| O  | 0.147633  | -2.403860 | -2.266091 |
| H  | 1.008734  | -2.825671 | -2.438436 |
| H  | -0.502836 | -3.054424 | -2.585227 |

HF=-4508.805617

xyz coordinates of Isomer 4 for Ni(II) complex

|   |           |           |           |
|---|-----------|-----------|-----------|
| C | -4.458372 | -0.290243 | 1.622888  |
| C | -6.050814 | 1.304712  | 1.020842  |
| C | -5.176704 | 1.859395  | 0.079871  |
| C | -3.510778 | 0.131888  | 0.720712  |
| H | -7.978955 | 1.353959  | 1.969764  |
| H | -4.295844 | -1.126098 | 2.295501  |
| C | -7.331732 | 1.814761  | 1.231296  |
| C | -5.619084 | 2.970472  | -0.664643 |
| C | -6.887763 | 3.506012  | -0.481161 |
| C | -7.735457 | 2.906903  | 0.479204  |
| H | -4.933800 | 3.397350  | -1.389482 |
| H | -8.731444 | 3.313424  | 0.634035  |
| C | -7.366606 | 4.694057  | -1.279298 |
| H | -8.240269 | 4.434109  | -1.888964 |
| H | -7.666377 | 5.518012  | -0.621188 |
| H | -6.586954 | 5.065110  | -1.950052 |
| C | -3.839079 | 1.292121  | -0.126048 |
| O | -3.061300 | 1.800924  | -0.956128 |
| O | -5.668866 | 0.227037  | 1.786837  |
| C | -2.275494 | -0.664132 | 0.794451  |
| H | -2.196919 | -1.258751 | 1.697068  |
| N | -1.285507 | -0.882757 | -0.014774 |
| N | -1.320464 | -0.176431 | -1.215414 |
| H | -1.897537 | 0.688817  | -1.234601 |
| C | -0.771831 | -0.707121 | -2.335975 |
| S | 0.095250  | -2.155805 | -2.308290 |
| N | -1.010707 | 0.029981  | -3.454963 |
| H | -1.757490 | 0.720335  | -3.414565 |
| N | -0.549550 | -0.410117 | -4.697434 |
| H | -1.299165 | -0.862686 | -5.218870 |
| H | -0.200972 | 0.386868  | -5.222628 |
| N | 1.455771  | -1.043989 | 0.077801  |

|    |           |           |           |
|----|-----------|-----------|-----------|
| S  | -0.180264 | -2.495501 | 1.950194  |
| C  | 2.396942  | -0.712828 | -0.750966 |
| N  | 1.560786  | -0.585796 | 1.375643  |
| C  | 0.838657  | -1.197712 | 2.341412  |
| C  | 3.642542  | 0.065044  | -0.660756 |
| H  | 2.214073  | -1.130040 | -1.736727 |
| N  | 1.003654  | -0.672291 | 3.579785  |
| C  | 4.426588  | -0.068724 | -1.782700 |
| C  | 4.124604  | 0.960763  | 0.407375  |
| H  | 1.703694  | 0.054979  | 3.709644  |
| N  | 0.383496  | -1.248391 | 4.688546  |
| H  | 4.140265  | -0.687400 | -2.627146 |
| O  | 5.602739  | 0.507049  | -1.991087 |
| C  | 5.425346  | 1.592046  | 0.156880  |
| O  | 3.501487  | 1.205939  | 1.457412  |
| H  | 1.071982  | -1.709157 | 5.280745  |
| H  | -0.097143 | -0.528046 | 5.220921  |
| C  | 6.125052  | 1.341585  | -1.028529 |
| C  | 6.005166  | 2.463533  | 1.099679  |
| C  | 7.365176  | 1.921897  | -1.292246 |
| C  | 7.238686  | 3.060665  | 0.870956  |
| H  | 5.455016  | 2.654768  | 2.014980  |
| H  | 7.875267  | 1.700887  | -2.223662 |
| C  | 7.907468  | 2.772570  | -0.341322 |
| C  | 7.863004  | 3.994997  | 1.878197  |
| H  | 8.873846  | 3.230428  | -0.535517 |
| H  | 8.840535  | 3.624336  | 2.208491  |
| H  | 8.024414  | 4.989905  | 1.446592  |
| H  | 7.230069  | 4.110433  | 2.762146  |
| H  | 2.249034  | 0.174958  | 1.562647  |
| O  | 1.243856  | -3.825350 | -0.306938 |
| H  | 1.550658  | -4.118985 | 0.570321  |
| H  | 0.647891  | -4.545403 | -0.604972 |
| Cl | -1.765020 | -3.783601 | -0.404936 |
| Ni | -0.044539 | -2.327937 | -0.148101 |

HF=-4508.8310651

**xyz coordinates of Isomer 5 for Ni(II) complex**

|   |           |           |           |
|---|-----------|-----------|-----------|
| C | -4.561643 | -2.196070 | -0.822468 |
| C | -6.851368 | -1.776066 | -0.675901 |
| C | -6.610518 | -0.428386 | -0.389184 |
| C | -4.173656 | -0.902715 | -0.553568 |
| H | -8.285657 | -3.347535 | -0.981338 |
| H | -3.848781 | -2.993087 | -1.006643 |
| C | -8.142888 | -2.295847 | -0.757408 |

|   |            |           |           |
|---|------------|-----------|-----------|
| C | -7.719374  | 0.414866  | -0.178684 |
| C | -9.020057  | -0.067692 | -0.251920 |
| C | -9.210738  | -1.437877 | -0.545109 |
| H | -7.524659  | 1.458629  | 0.044083  |
| H | -10.222129 | -1.831153 | -0.605391 |
| C | -10.210029 | 0.832925  | -0.027085 |
| H | -10.856908 | 0.861837  | -0.911993 |
| H | -10.823209 | 0.476632  | 0.809117  |
| H | -9.899307  | 1.857215  | 0.195965  |
| C | -5.239269  | 0.088216  | -0.308829 |
| O | -5.041447  | 1.290619  | -0.050612 |
| O | -5.807589  | -2.646405 | -0.889445 |
| C | -2.710142  | -0.761164 | -0.560948 |
| H | -2.182845  | -1.684967 | -0.777194 |
| N | -1.862105  | 0.197456  | -0.318304 |
| N | -2.404869  | 1.432533  | 0.000223  |
| H | -3.444771  | 1.513094  | 0.025603  |
| C | -1.586549  | 2.479135  | 0.247643  |
| S | 0.082228   | 2.292026  | 0.128559  |
| N | -2.228980  | 3.621872  | 0.592703  |
| H | -3.234535  | 3.587574  | 0.742633  |
| N | -1.514308  | 4.779103  | 0.896491  |
| H | -1.860921  | 5.553031  | 0.335591  |
| H | -1.606452  | 5.000748  | 1.885583  |
| N | 1.925303   | 0.040985  | 0.013229  |
| S | -0.192624  | -0.160727 | 1.917518  |
| C | 2.814217   | 0.237974  | -0.912029 |
| N | 2.348455   | -0.324682 | 1.262708  |
| C | 1.423923   | -0.469550 | 2.244170  |
| C | 4.282349   | 0.154520  | -0.983902 |
| H | 2.350228   | 0.541326  | -1.843317 |
| H | 3.356117   | -0.559878 | 1.379904  |
| N | 1.933134   | -0.853396 | 3.440377  |
| C | 4.779039   | 0.583291  | -2.190631 |
| C | 5.253169   | -0.335381 | 0.014623  |
| O | 4.952449   | -0.768753 | 1.141206  |
| H | 2.913778   | -1.118437 | 3.486708  |
| N | 1.090267   | -1.100105 | 4.522503  |
| H | 4.141574   | 0.948280  | -2.989047 |
| O | 6.056745   | 0.619052  | -2.553062 |
| C | 6.659872   | -0.293218 | -0.404265 |
| H | 1.067587   | -2.095840 | 4.733384  |
| H | 1.416712   | -0.581635 | 5.333613  |
| C | 7.016989   | 0.183433  | -1.669540 |
| C | 7.686477   | -0.730881 | 0.455370  |
| C | 8.345168   | 0.236046  | -2.092249 |
| C | 9.020086   | -0.694176 | 0.068133  |
| H | 7.400619   | -1.100411 | 1.434504  |



|    |           |           |           |
|----|-----------|-----------|-----------|
| H  | 8.579437  | 0.612501  | -3.082207 |
| C  | 9.330001  | -0.202035 | -1.220710 |
| C  | 10.121846 | -1.165217 | 0.985901  |
| H  | 10.368629 | -0.166589 | -1.538941 |
| H  | 10.680170 | -1.996230 | 0.538658  |
| H  | 10.841916 | -0.362623 | 1.184854  |
| H  | 9.723720  | -1.505880 | 1.945521  |
| O  | 0.247315  | 0.388543  | -2.144066 |
| H  | -0.350866 | 1.027110  | -2.566173 |
| H  | 0.067308  | -0.488512 | -2.535978 |
| Ni | 0.031599  | 0.119218  | -0.152539 |
| Cl | -0.019687 | -2.081747 | -0.437279 |

HF=-4508.8365847

**xyz coordinates of Isomer 1 for Cu(II) complex**

|   |            |           |           |
|---|------------|-----------|-----------|
| C | -4.990957  | -2.079849 | -0.238897 |
| C | -7.096642  | -1.458587 | 0.548914  |
| C | -6.745301  | -0.105704 | 0.492105  |
| C | -4.508937  | -0.798462 | -0.339827 |
| H | -8.587567  | -2.936974 | 1.009341  |
| H | -4.397716  | -2.951678 | -0.494836 |
| C | -8.355314  | -1.877846 | 0.979551  |
| C | -7.705259  | 0.847729  | 0.884442  |
| C | -8.968563  | 0.466890  | 1.318830  |
| C | -9.275159  | -0.912925 | 1.359151  |
| H | -7.424777  | 1.894678  | 0.837292  |
| H | -10.259089 | -1.227532 | 1.697059  |
| C | -9.998719  | 1.485604  | 1.741830  |
| H | -10.907155 | 1.405832  | 1.133120  |
| H | -10.296273 | 1.336466  | 2.786611  |
| H | -9.616107  | 2.505095  | 1.643521  |
| C | -5.411079  | 0.304465  | 0.038332  |
| O | -5.111737  | 1.511695  | -0.013990 |
| O | -6.201796  | -2.434800 | 0.175916  |
| C | -3.120733  | -0.737936 | -0.833055 |
| H | -2.729385  | -1.714974 | -1.110245 |
| N | -2.228374  | 0.184049  | -0.974329 |
| N | -2.539403  | 1.481918  | -0.677199 |
| H | -3.524541  | 1.667595  | -0.397728 |
| C | -1.611714  | 2.476909  | -0.592861 |
| S | 0.059464   | 2.338070  | -0.886363 |
| N | -2.175963  | 3.660228  | -0.237128 |
| H | -3.158786  | 3.666707  | 0.025604  |
| N | -1.401643  | 4.800913  | -0.037578 |
| H | -1.788093  | 5.572578  | -0.574877 |

|    |           |           |           |
|----|-----------|-----------|-----------|
| H  | -1.380799 | 5.042537  | 0.951231  |
| N  | 2.190595  | -0.151701 | -0.761546 |
| S  | -0.067218 | -2.339838 | -0.847762 |
| C  | 3.085227  | 0.766059  | -0.621602 |
| N  | 2.512570  | -1.458453 | -0.533118 |
| C  | 1.600010  | -2.468123 | -0.526687 |
| C  | 4.499984  | 0.809262  | -0.205430 |
| H  | 2.680162  | 1.752198  | -0.838309 |
| H  | 3.501368  | -1.652899 | -0.272727 |
| N  | 2.170912  | -3.659877 | -0.209734 |
| C  | 5.002078  | 2.084749  | -0.136113 |
| C  | 5.406760  | -0.302494 | 0.132904  |
| O  | 5.090680  | -1.506424 | 0.106885  |
| H  | 3.144552  | -3.665905 | 0.084736  |
| N  | 1.415382  | -4.826486 | -0.119157 |
| H  | 4.406684  | 2.962345  | -0.365756 |
| O  | 6.238003  | 2.427260  | 0.211415  |
| C  | 6.767342  | 0.093672  | 0.516286  |
| H  | 1.841236  | -5.552852 | -0.689079 |
| H  | 1.360147  | -5.134325 | 0.849659  |
| C  | 7.138369  | 1.442179  | 0.544245  |
| C  | 7.733746  | -0.869322 | 0.867533  |
| C  | 8.422931  | 1.847830  | 0.906472  |
| C  | 9.022239  | -0.502002 | 1.234080  |
| H  | 7.437778  | -1.912781 | 0.843286  |
| H  | 8.669859  | 2.904019  | 0.915674  |
| C  | 9.348437  | 0.873852  | 1.246835  |
| C  | 10.059540 | -1.531002 | 1.612573  |
| H  | 10.352326 | 1.177919  | 1.531531  |
| H  | 10.933046 | -1.473664 | 0.952302  |
| H  | 10.418253 | -1.372734 | 2.636582  |
| H  | 9.656858  | -2.545621 | 1.550507  |
| Cu | -0.003447 | 0.015001  | -0.867194 |
| Cl | -0.106363 | 0.035694  | 1.302768  |
| O  | 0.086440  | -0.003073 | -2.762441 |
| H  | -0.305555 | 0.758555  | -3.223314 |
| H  | -0.205193 | -0.819188 | -3.205056 |

HF=-4640.9746557

**xyz coordinates of Isomer 2 for Cu(II) complex**

|   |           |          |          |
|---|-----------|----------|----------|
| C | -2.022188 | 2.691475 | 0.260840 |
| C | -4.034847 | 3.870749 | 0.234228 |
| C | -4.751121 | 2.685416 | 0.038677 |
| C | -2.588817 | 1.456662 | 0.075614 |
| H | -4.076817 | 6.006698 | 0.475204 |
| H | -0.951115 | 2.835224 | 0.358311 |
| C | -4.668639 | 5.110295 | 0.323897 |

|   |           |           |           |
|---|-----------|-----------|-----------|
| C | -6.153323 | 2.765419  | -0.069547 |
| C | -6.818150 | 3.982285  | 0.014309  |
| C | -6.049689 | 5.152471  | 0.213158  |
| H | -6.700107 | 1.840860  | -0.221997 |
| H | -6.554422 | 6.112698  | 0.280631  |
| C | -8.320363 | 4.071184  | -0.102093 |
| H | -8.762935 | 4.501310  | 0.804269  |
| H | -8.614696 | 4.713128  | -0.940839 |
| H | -8.767592 | 3.086006  | -0.259640 |
| C | -4.058063 | 1.393437  | -0.053780 |
| O | -4.707730 | 0.348702  | -0.231313 |
| O | -2.663748 | 3.854514  | 0.344216  |
| C | -1.602468 | 0.361670  | 0.013833  |
| H | -0.571854 | 0.702398  | 0.085186  |
| N | -1.660250 | -0.920254 | -0.116989 |
| N | -2.849894 | -1.564152 | -0.233111 |
| H | -3.698982 | -0.968114 | -0.242755 |
| C | -2.936548 | -2.918764 | -0.467612 |
| S | -1.628769 | -3.975072 | -0.475502 |
| N | -4.221309 | -3.294162 | -0.706748 |
| H | -4.924164 | -2.570135 | -0.836438 |
| N | -4.552219 | -4.626189 | -0.940895 |
| H | -5.317618 | -4.900493 | -0.330807 |
| H | -4.817478 | -4.759113 | -1.914508 |
| N | 1.400303  | -0.812010 | -0.062276 |
| S | -0.148457 | -2.606780 | 1.829052  |
| C | 2.150098  | -0.274433 | -0.966403 |
| N | 1.788993  | -0.788894 | 1.257313  |
| C | 1.132781  | -1.525157 | 2.189367  |
| C | 3.465880  | 0.387603  | -0.981470 |
| H | 1.694123  | -0.394748 | -1.948442 |
| N | 1.591243  | -1.328013 | 3.448862  |
| C | 3.925669  | 0.636763  | -2.251954 |
| C | 4.301501  | 0.824205  | 0.150069  |
| H | 2.351011  | -0.667282 | 3.596996  |
| N | 1.083839  | -2.060649 | 4.519821  |
| H | 3.367631  | 0.362593  | -3.141455 |
| O | 5.075294  | 1.220647  | -2.568291 |
| C | 5.570250  | 1.462784  | -0.218242 |
| O | 3.989984  | 0.691395  | 1.349247  |
| H | 1.822562  | -2.612998 | 4.949112  |
| H | 0.675034  | -1.434042 | 5.208715  |
| C | 5.917154  | 1.637675  | -1.562780 |
| C | 6.471907  | 1.914622  | 0.765436  |
| C | 7.116837  | 2.238392  | -1.944087 |
| C | 7.676270  | 2.516103  | 0.422478  |
| H | 6.194897  | 1.776163  | 1.805259  |
| H | 7.348192  | 2.354993  | -2.997410 |

|    |           |           |           |
|----|-----------|-----------|-----------|
| C  | 7.981326  | 2.669312  | -0.949920 |
| C  | 8.646050  | 2.998300  | 1.473511  |
| H  | 8.919622  | 3.137800  | -1.235117 |
| H  | 9.613254  | 2.490086  | 1.381560  |
| H  | 8.835937  | 4.073451  | 1.372897  |
| H  | 8.265208  | 2.816550  | 2.482158  |
| H  | 2.640296  | -0.234213 | 1.491027  |
| O  | 1.143929  | -3.542221 | -0.386581 |
| H  | 1.236690  | -4.311106 | 0.206063  |
| H  | 1.342162  | -3.831075 | -1.301061 |
| Cl | -0.089377 | -2.107754 | -2.409481 |
| Cu | -0.119643 | -2.360691 | -0.265096 |

HF=-4640.919524

**xyz coordinates of Isomer 3 for Cu(II) complex**

|   |           |           |           |
|---|-----------|-----------|-----------|
| C | -2.433774 | 1.718418  | 1.754551  |
| C | -4.423530 | 2.923819  | 1.571104  |
| C | -4.664938 | 2.386184  | 0.301551  |
| C | -2.558110 | 1.096816  | 0.535447  |
| H | -5.073638 | 4.226605  | 3.152460  |
| H | -1.596513 | 1.539218  | 2.421409  |
| C | -5.296522 | 3.834373  | 2.166019  |
| C | -5.826500 | 2.793398  | -0.383618 |
| C | -6.717368 | 3.699972  | 0.177362  |
| C | -6.431306 | 4.211092  | 1.464615  |
| H | -6.003473 | 2.376086  | -1.369477 |
| H | -7.118708 | 4.920592  | 1.917687  |
| C | -7.963851 | 4.137161  | -0.552502 |
| H | -8.866315 | 3.852115  | 0.001439  |
| H | -7.990119 | 5.226498  | -0.672791 |
| H | -8.023184 | 3.686930  | -1.547048 |
| C | -3.731337 | 1.422956  | -0.291643 |
| O | -3.942025 | 0.953323  | -1.426969 |
| O | -3.297746 | 2.574891  | 2.283101  |
| C | -1.424903 | 0.216607  | 0.215826  |
| H | -0.537362 | 0.411083  | 0.809977  |
| N | -1.271595 | -0.810838 | -0.559577 |
| N | -2.369691 | -1.169973 | -1.344073 |
| H | -3.031674 | -0.401765 | -1.583772 |
| C | -2.747904 | -2.460662 | -1.222418 |
| S | -1.768310 | -3.508979 | -0.327239 |
| N | -3.921273 | -2.793361 | -1.811570 |
| H | -4.522911 | -2.042073 | -2.142426 |
| N | -4.406768 | -4.097907 | -1.724121 |
| H | -5.205300 | -4.142240 | -1.094461 |

|    |           |           |           |
|----|-----------|-----------|-----------|
| H  | -4.673848 | -4.427344 | -2.647808 |
| N  | 1.561772  | -1.145843 | -0.069147 |
| S  | 1.349111  | -3.813106 | 0.204859  |
| C  | 1.714692  | -0.032911 | -0.726562 |
| N  | 2.599166  | -1.610112 | 0.684023  |
| C  | 2.545895  | -2.930886 | 0.969400  |
| C  | 2.817699  | 0.928826  | -0.840451 |
| H  | 0.851922  | 0.197317  | -1.342964 |
| N  | 3.446195  | -3.389449 | 1.868370  |
| C  | 2.728598  | 1.751064  | -1.936286 |
| C  | 3.929705  | 1.157074  | 0.102557  |
| H  | 3.881659  | -2.704346 | 2.482627  |
| N  | 3.421559  | -4.734242 | 2.243727  |
| H  | 1.923358  | 1.680201  | -2.660639 |
| O  | 3.582795  | 2.714210  | -2.266326 |
| C  | 4.866251  | 2.220818  | -0.281564 |
| O  | 4.082760  | 0.531919  | 1.166020  |
| H  | 4.374857  | -5.063801 | 2.362314  |
| H  | 2.896212  | -4.854293 | 3.108356  |
| C  | 4.667025  | 2.958858  | -1.453745 |
| C  | 5.986105  | 2.527005  | 0.515939  |
| C  | 5.541673  | 3.972037  | -1.845860 |
| C  | 6.878971  | 3.528797  | 0.155845  |
| H  | 6.129906  | 1.951215  | 1.424252  |
| H  | 5.352286  | 4.521273  | -2.761921 |
| C  | 6.635867  | 4.244444  | -1.039398 |
| C  | 8.082415  | 3.857124  | 1.005362  |
| H  | 7.325104  | 5.030948  | -1.335428 |
| H  | 9.012939  | 3.722030  | 0.441347  |
| H  | 8.057017  | 4.900882  | 1.340281  |
| H  | 8.131277  | 3.220195  | 1.892678  |
| H  | 3.258985  | -0.907684 | 1.071167  |
| Cu | -0.007289 | -2.259276 | -0.190759 |
| Cl | -0.210805 | -2.133824 | 1.911883  |
| O  | 0.196107  | -2.384619 | -2.292030 |
| H  | 1.001171  | -2.921290 | -2.404752 |
| H  | -0.491222 | -2.880994 | -2.767420 |

HF=-4640.8930921

**xyz coordinates of Isomer 4 for Cu(II) complex**

|   |           |           |          |
|---|-----------|-----------|----------|
| C | -4.489454 | -0.654956 | 1.517845 |
| C | -6.174667 | 0.915487  | 1.150842 |
| C | -5.294275 | 1.730007  | 0.430043 |
| C | -3.528207 | 0.026906  | 0.811602 |
| H | -8.157443 | 0.609867  | 1.922519 |

|   |           |           |           |
|---|-----------|-----------|-----------|
| H | -4.297143 | -1.608206 | 1.999122  |
| C | -7.507524 | 1.270579  | 1.358905  |
| C | -5.785602 | 2.943974  | -0.089139 |
| C | -7.106831 | 3.329633  | 0.098372  |
| C | -7.958207 | 2.470178  | 0.830979  |
| H | -5.095115 | 3.571755  | -0.642599 |
| H | -8.994961 | 2.757181  | 0.985955  |
| C | -7.637627 | 4.627776  | -0.459491 |
| H | -8.451582 | 4.448297  | -1.172034 |
| H | -8.040755 | 5.264990  | 0.336441  |
| H | -6.855364 | 5.189921  | -0.976786 |
| C | -3.899996 | 1.323124  | 0.222373  |
| O | -3.112577 | 2.065585  | -0.398349 |
| O | -5.749200 | -0.275078 | 1.692631  |
| C | -2.226834 | -0.663739 | 0.813278  |
| H | -2.130054 | -1.397442 | 1.606061  |
| N | -1.201871 | -0.679460 | 0.014079  |
| N | -1.272901 | 0.273373  | -1.013293 |
| H | -1.866297 | 1.110290  | -0.835261 |
| C | -0.802745 | -0.011050 | -2.242929 |
| S | -0.016350 | -1.472537 | -2.584827 |
| N | -1.037946 | 0.959397  | -3.168022 |
| H | -1.737443 | 1.663057  | -2.940462 |
| N | -0.678006 | 0.752475  | -4.501527 |
| H | -1.489165 | 0.480756  | -5.055341 |
| H | -0.280002 | 1.609331  | -4.875506 |
| N | 1.520528  | -1.035479 | -0.109545 |
| S | -0.150044 | -2.767211 | 1.459606  |
| C | 2.439507  | -0.550943 | -0.883970 |
| N | 1.691671  | -0.877263 | 1.249618  |
| C | 0.964694  | -1.649823 | 2.082633  |
| C | 3.709624  | 0.167828  | -0.687051 |
| H | 2.207488  | -0.738964 | -1.928556 |
| N | 1.203688  | -1.443999 | 3.399052  |
| C | 4.429172  | 0.289766  | -1.852361 |
| C | 4.275168  | 0.774541  | 0.532667  |
| H | 1.949200  | -0.804386 | 3.664795  |
| N | 0.555083  | -2.206677 | 4.369985  |
| H | 4.080656  | -0.107658 | -2.800212 |
| O | 5.609119  | 0.879240  | -1.988001 |
| C | 5.579004  | 1.426003  | 0.362275  |
| O | 3.718027  | 0.770403  | 1.646427  |
| H | 1.216068  | -2.827697 | 4.832630  |
| H | 0.125488  | -1.591619 | 5.056187  |
| C | 6.206282  | 1.453389  | -0.888069 |
| C | 6.234547  | 2.038734  | 1.448282  |
| C | 7.446738  | 2.060274  | -1.080586 |
| C | 7.471204  | 2.653128  | 1.294107  |

|    |           |           |           |
|----|-----------|-----------|-----------|
| H  | 5.740958  | 2.016026  | 2.414134  |
| H  | 7.898736  | 2.059278  | -2.066618 |
| C  | 8.064521  | 2.651773  | 0.010504  |
| C  | 8.177644  | 3.308339  | 2.455613  |
| H  | 9.031671  | 3.128156  | -0.126576 |
| H  | 9.145534  | 2.830817  | 2.649328  |
| H  | 8.375516  | 4.367171  | 2.251544  |
| H  | 7.583157  | 3.247105  | 3.371152  |
| H  | 2.424116  | -0.208514 | 1.573601  |
| O  | 1.096284  | -3.656696 | -1.120767 |
| H  | 1.507504  | -4.177157 | -0.408573 |
| H  | 0.413943  | -4.252453 | -1.492812 |
| Cu | -0.083880 | -2.126985 | -0.539495 |
| Cl | -1.922449 | -3.363007 | -1.026561 |

HF=-4640.9213657

**xyz coordinates of Isomer 5 for Cu(II) complex**

|   |            |           |           |
|---|------------|-----------|-----------|
| C | -4.510352  | -1.820146 | -1.429948 |
| C | -6.767405  | -1.604720 | -0.881680 |
| C | -6.539896  | -0.333251 | -0.343986 |
| C | -4.136752  | -0.595222 | -0.926394 |
| H | -8.169387  | -3.173358 | -1.322436 |
| H | -3.803008  | -2.503363 | -1.888267 |
| C | -8.035796  | -2.185163 | -0.895551 |
| C | -7.637805  | 0.367734  | 0.193538  |
| C | -8.914332  | -0.179481 | 0.197744  |
| C | -9.092523  | -1.468471 | -0.356536 |
| H | -7.453286  | 1.353989  | 0.606214  |
| H | -10.085352 | -1.910726 | -0.361398 |
| C | -10.092203 | 0.567573  | 0.774256  |
| H | -10.868974 | 0.726633  | 0.016871  |
| H | -10.552918 | 0.006169  | 1.595737  |
| H | -9.794232  | 1.545994  | 1.160755  |
| C | -5.194341  | 0.249547  | -0.344026 |
| O | -5.008889  | 1.394190  | 0.115864  |
| O | -5.735419  | -2.332628 | -1.425042 |
| C | -2.702899  | -0.326143 | -1.123846 |
| H | -2.213837  | -1.056300 | -1.757456 |
| N | -1.835150  | 0.520599  | -0.636984 |
| N | -2.379909  | 1.519792  | 0.165020  |
| H | -3.421915  | 1.593922  | 0.209832  |
| C | -1.571526  | 2.413220  | 0.757589  |
| S | 0.105988   | 2.244775  | 0.637985  |
| N | -2.200526  | 3.404148  | 1.433616  |
| H | -3.216026  | 3.383791  | 1.490240  |
| N | -1.471247  | 4.338751  | 2.166673  |

|    |           |           |           |
|----|-----------|-----------|-----------|
| H  | -1.718016 | 5.278799  | 1.867902  |
| H  | -1.659523 | 4.231258  | 3.161139  |
| N  | 1.907019  | 0.081471  | -0.106193 |
| S  | -0.367078 | -0.653226 | 1.456136  |
| C  | 2.883468  | 0.568957  | -0.808886 |
| N  | 2.209156  | -0.735793 | 0.945562  |
| C  | 1.196739  | -1.181322 | 1.733353  |
| C  | 4.353106  | 0.465710  | -0.772240 |
| H  | 2.513370  | 1.211976  | -1.600199 |
| H  | 3.190475  | -1.074344 | 1.025759  |
| N  | 1.588871  | -2.037567 | 2.708111  |
| C  | 4.969614  | 1.325493  | -1.647327 |
| C  | 5.214675  | -0.431753 | 0.021562  |
| O  | 4.797017  | -1.278278 | 0.831916  |
| H  | 2.549681  | -2.371372 | 2.699495  |
| N  | 0.658594  | -2.610347 | 3.573542  |
| H  | 4.416621  | 2.008172  | -2.284064 |
| O  | 6.277769  | 1.452603  | -1.841323 |
| C  | 6.657363  | -0.280764 | -0.207544 |
| H  | 0.564701  | -3.605573 | 3.380794  |
| H  | 0.958638  | -2.471768 | 4.534962  |
| C  | 7.142122  | 0.655739  | -1.126503 |
| C  | 7.590549  | -1.073088 | 0.489293  |
| C  | 8.506688  | 0.821789  | -1.362660 |
| C  | 8.957007  | -0.935375 | 0.279982  |
| H  | 7.205595  | -1.798598 | 1.198086  |
| H  | 8.841160  | 1.559209  | -2.084437 |
| C  | 9.397171  | 0.026597  | -0.658292 |
| C  | 9.959342  | -1.781919 | 1.026184  |
| H  | 10.462968 | 0.146668  | -0.834215 |
| H  | 10.574210 | -2.369278 | 0.333997  |
| H  | 10.642555 | -1.158707 | 1.615371  |
| H  | 9.464432  | -2.477348 | 1.709447  |
| O  | 0.423677  | 1.219058  | -2.130062 |
| H  | -0.151632 | 1.961272  | -2.378998 |
| H  | 0.292858  | 0.524489  | -2.803584 |
| Cu | 0.035940  | 0.301004  | -0.371660 |
| Cl | -0.035116 | -1.667981 | -1.394358 |

HF=-4640.920911

**xyz coordinates of Isomer 1 for Cd(II) complex**

|   |          |           |          |
|---|----------|-----------|----------|
| C | 5.098543 | -2.103070 | 0.173436 |
| C | 7.340364 | -1.460901 | 0.181318 |
| C | 6.974929 | -0.115565 | 0.076080 |
| C | 4.593853 | -0.833362 | 0.070159 |



|   |           |           |           |
|---|-----------|-----------|-----------|
| H | 8.921074  | -2.911229 | 0.321003  |
| H | 4.464242  | -2.981622 | 0.219646  |
| C | 8.679450  | -1.856729 | 0.239455  |
| C | 7.998371  | 0.851166  | 0.029465  |
| C | 9.338992  | 0.492674  | 0.084685  |
| C | 9.661076  | -0.880021 | 0.190376  |
| H | 7.700140  | 1.891379  | -0.051831 |
| H | 10.705623 | -1.178586 | 0.234598  |
| C | 10.436360 | 1.529365  | 0.033969  |
| H | 11.058519 | 1.495317  | 0.936834  |
| H | 11.101311 | 1.363288  | -0.822524 |
| H | 10.025361 | 2.539352  | -0.051617 |
| C | 5.557089  | 0.280362  | 0.014096  |
| O | 5.254642  | 1.481475  | -0.080923 |
| O | 6.390516  | -2.446910 | 0.230776  |
| C | 3.118171  | -0.793153 | 0.017670  |
| H | 2.668154  | -1.783220 | 0.036179  |
| N | 2.221891  | 0.130769  | -0.038039 |
| N | 2.551922  | 1.446466  | -0.064294 |
| H | 3.557943  | 1.672006  | -0.037180 |
| C | 1.623800  | 2.470555  | -0.104083 |
| S | -0.039231 | 2.314578  | -0.045215 |
| N | 2.283201  | 3.678390  | -0.195353 |
| H | 3.236216  | 3.645736  | -0.550084 |
| N | 1.564379  | 4.862839  | -0.351691 |
| H | 2.012563  | 5.593564  | 0.192692  |
| H | 1.520430  | 5.135562  | -1.332748 |
| N | -2.206199 | -0.147190 | -0.031060 |
| S | 0.024405  | -2.364721 | -0.023688 |
| C | -3.096666 | 0.783230  | 0.023433  |
| N | -2.553089 | -1.459426 | -0.055866 |
| C | -1.639945 | -2.496605 | -0.090082 |
| C | -4.571946 | 0.835064  | 0.075871  |
| H | -2.641064 | 1.770437  | 0.042524  |
| H | -3.562152 | -1.671347 | -0.035538 |
| N | -2.316829 | -3.694669 | -0.181404 |
| C | -5.064803 | 2.108992  | 0.186306  |
| C | -5.546062 | -0.268919 | 0.012338  |
| O | -5.255390 | -1.472374 | -0.089764 |
| H | -3.269130 | -3.649007 | -0.536530 |
| N | -1.615580 | -4.890143 | -0.332542 |
| H | -4.422208 | 2.981196  | 0.237976  |
| O | -6.353303 | 2.464818  | 0.245067  |
| C | -6.960045 | 0.140336  | 0.075362  |
| H | -2.074925 | -5.612306 | 0.213951  |
| H | -1.574394 | -5.167004 | -1.312530 |
| C | -7.312668 | 1.488391  | 0.188771  |
| C | -7.992678 | -0.816204 | 0.021614  |

|    |            |           |           |
|----|------------|-----------|-----------|
| C  | -8.647879  | 1.896792  | 0.248388  |
| C  | -9.329829  | -0.445129 | 0.077996  |
| H  | -7.704440  | -1.858697 | -0.066190 |
| H  | -8.879383  | 2.953033  | 0.336449  |
| C  | -9.638800  | 0.929893  | 0.192270  |
| C  | -10.437127 | -1.470798 | 0.019543  |
| H  | -10.680476 | 1.238170  | 0.237502  |
| H  | -11.059648 | -1.436757 | 0.922159  |
| H  | -11.099715 | -1.292509 | -0.836314 |
| H  | -10.035869 | -2.484117 | -0.072516 |
| Cl | -0.010423  | -0.019214 | -2.207000 |
| Cl | -0.004851  | 0.000793  | 2.125450  |
| Cd | -0.007629  | -0.009181 | -0.034525 |

HF=-3432.53667

**xyz coordinates of Isomer 2 for Cd(II) complex**

|   |           |           |           |
|---|-----------|-----------|-----------|
| C | -2.434773 | 2.762033  | 0.784822  |
| C | -4.505257 | 3.821550  | 0.600727  |
| C | -5.063650 | 2.673315  | 0.031005  |
| C | -2.847033 | 1.567935  | 0.256681  |
| H | -4.789964 | 5.848517  | 1.258744  |
| H | -1.416605 | 2.934100  | 1.117011  |
| C | -5.260401 | 4.977625  | 0.814556  |
| C | -6.424247 | 2.702692  | -0.331232 |
| C | -7.204474 | 3.834371  | -0.130957 |
| C | -6.597069 | 4.972042  | 0.448387  |
| H | -6.843287 | 1.804615  | -0.773531 |
| H | -7.192795 | 5.866823  | 0.611371  |
| C | -8.665030 | 3.864173  | -0.514472 |
| H | -9.302173 | 4.044390  | 0.360168  |
| H | -8.871285 | 4.665399  | -1.234619 |
| H | -8.976712 | 2.918240  | -0.966381 |
| C | -4.249081 | 1.464817  | -0.187490 |
| O | -4.750249 | 0.463637  | -0.721698 |
| O | -3.184603 | 3.855370  | 0.969230  |
| C | -1.779321 | 0.552756  | 0.168488  |
| H | -0.785216 | 0.951289  | 0.363531  |
| N | -1.738422 | -0.717551 | -0.054026 |
| N | -2.865202 | -1.438989 | -0.300722 |
| H | -3.726640 | -0.906914 | -0.492876 |
| C | -2.834638 | -2.805633 | -0.565570 |
| S | -1.567815 | -3.842168 | -0.211303 |
| N | -3.986016 | -3.171544 | -1.219777 |
| H | -4.339676 | -2.480021 | -1.880037 |
| N | -4.170571 | -4.523778 | -1.542915 |

|    |           |           |           |
|----|-----------|-----------|-----------|
| H  | -5.160382 | -4.670990 | -1.715448 |
| H  | -3.631528 | -4.768675 | -2.374625 |
| N  | 1.399919  | -0.399991 | 0.030476  |
| S  | -0.114784 | -2.212370 | 2.016197  |
| C  | 2.102798  | 0.124319  | -0.914205 |
| N  | 1.780996  | -0.366505 | 1.347331  |
| C  | 1.230145  | -1.231107 | 2.279637  |
| C  | 3.413484  | 0.792515  | -0.998071 |
| H  | 1.622774  | -0.056440 | -1.876058 |
| N  | 2.004168  | -1.264950 | 3.415910  |
| C  | 3.821223  | 1.018225  | -2.287329 |
| C  | 4.310185  | 1.216229  | 0.089537  |
| H  | 3.005382  | -1.164458 | 3.249446  |
| N  | 1.615143  | -2.116810 | 4.461835  |
| H  | 3.228155  | 0.724667  | -3.146618 |
| O  | 4.965507  | 1.596073  | -2.668641 |
| C  | 5.562962  | 1.856382  | -0.348417 |
| O  | 4.076159  | 1.074369  | 1.301385  |
| H  | 1.896276  | -3.077802 | 4.261571  |
| H  | 2.072206  | -1.794952 | 5.309787  |
| C  | 5.846791  | 2.019626  | -1.707897 |
| C  | 6.509093  | 2.312855  | 0.589661  |
| C  | 7.032568  | 2.616699  | -2.144321 |
| C  | 7.697639  | 2.910456  | 0.190396  |
| H  | 6.275690  | 2.178153  | 1.640938  |
| H  | 7.216549  | 2.722480  | -3.208263 |
| C  | 7.942194  | 3.054119  | -1.194747 |
| C  | 8.714178  | 3.395965  | 1.196563  |
| H  | 8.868196  | 3.518326  | -1.525134 |
| H  | 9.673809  | 2.878993  | 1.073236  |
| H  | 8.908811  | 4.469247  | 1.080502  |
| H  | 8.371734  | 3.225758  | 2.221309  |
| H  | 2.651170  | 0.141972  | 1.567899  |
| Cl | -0.021515 | -1.991825 | -2.245266 |
| Cl | 1.576903  | -3.471011 | -0.123941 |
| Cd | -0.069143 | -2.103967 | -0.089317 |

HF=-3432.4547438

**xyz coordinates of Isomer 3 for Cd(II) complex**

|   |          |          |           |
|---|----------|----------|-----------|
| C | 3.189907 | 1.422953 | -2.159895 |
| C | 5.175246 | 2.549232 | -1.663744 |
| C | 5.020117 | 2.283524 | -0.298688 |
| C | 2.939665 | 1.064754 | -0.866359 |
| H | 6.356466 | 3.452945 | -3.215893 |
| H | 2.539731 | 1.148823 | -2.984470 |
| C | 6.270046 | 3.267744 | -2.150389 |

|   |           |           |           |
|---|-----------|-----------|-----------|
| C | 5.998977  | 2.763462  | 0.591056  |
| C | 7.100494  | 3.480637  | 0.140199  |
| C | 7.217832  | 3.723698  | -1.247189 |
| H | 5.861651  | 2.549801  | 1.646431  |
| H | 8.073618  | 4.282628  | -1.617778 |
| C | 8.153878  | 3.992235  | 1.094127  |
| H | 9.141306  | 3.578679  | 0.855042  |
| H | 8.240556  | 5.084575  | 1.042790  |
| H | 7.918895  | 3.722556  | 2.127696  |
| C | 3.857336  | 1.519056  | 0.189051  |
| O | 3.679141  | 1.315499  | 1.398571  |
| O | 4.248892  | 2.120033  | -2.584621 |
| C | 1.694957  | 0.308872  | -0.650207 |
| H | 0.873785  | 0.541673  | -1.324165 |
| N | 1.426841  | -0.669966 | 0.150549  |
| N | 2.449776  | -1.081229 | 0.997662  |
| H | 2.916857  | -0.338329 | 1.528875  |
| C | 2.378768  | -2.394031 | 1.367510  |
| S | 1.525116  | -3.414371 | 0.354009  |
| N | 2.980261  | -2.682508 | 2.558601  |
| H | 2.811249  | -1.954940 | 3.253892  |
| N | 2.866617  | -4.009760 | 3.018436  |
| H | 3.528153  | -4.124592 | 3.780724  |
| H | 1.915622  | -4.165441 | 3.359269  |
| N | -1.419774 | -0.669384 | -0.375765 |
| S | -1.597344 | -3.349144 | -0.227812 |
| C | -1.582344 | 0.420146  | 0.309668  |
| N | -2.523587 | -1.112442 | -1.081385 |
| C | -2.619917 | -2.460064 | -1.187833 |
| C | -2.770374 | 1.248107  | 0.580587  |
| H | -0.697552 | 0.697108  | 0.874882  |
| N | -3.486640 | -2.906511 | -2.153433 |
| C | -2.811396 | 1.779137  | 1.840062  |
| C | -3.839323 | 1.589316  | -0.367117 |
| H | -3.473693 | -2.331516 | -2.995922 |
| N | -3.575832 | -4.297105 | -2.338314 |
| H | -2.055039 | 1.569589  | 2.589607  |
| O | -3.770465 | 2.578182  | 2.319157  |
| C | -4.877772 | 2.484204  | 0.173515  |
| O | -3.884180 | 1.190474  | -1.542079 |
| H | -4.450622 | -4.493577 | -2.814673 |
| H | -2.790252 | -4.633158 | -2.896323 |
| C | -4.808405 | 2.938680  | 1.495153  |
| C | -5.964559 | 2.898436  | -0.619461 |
| C | -5.785595 | 3.780326  | 2.032805  |
| C | -6.952626 | 3.735353  | -0.115997 |
| H | -6.003117 | 2.536583  | -1.642087 |
| H | -5.698072 | 4.110120  | 3.062658  |

|    |           |           |           |
|----|-----------|-----------|-----------|
| C  | -6.843073 | 4.168458  | 1.225127  |
| C  | -8.121747 | 4.176701  | -0.964450 |
| H  | -7.608182 | 4.822786  | 1.635741  |
| H  | -9.073616 | 3.839761  | -0.535653 |
| H  | -8.170201 | 5.270077  | -1.037895 |
| H  | -8.050902 | 3.774887  | -1.979243 |
| H  | -3.122627 | -0.405392 | -1.526664 |
| Cl | 0.209231  | -2.200374 | -2.120849 |
| Cd | -0.031617 | -1.962671 | -0.031881 |
| Cl | -0.305821 | -1.693035 | 2.337109  |

HF=-3432.3534938

**xyz coordinates of Isomer 4 for Cd(II) complex**

|   |           |           |           |
|---|-----------|-----------|-----------|
| C | -2.786430 | 1.896315  | 1.962974  |
| C | -4.694913 | 3.129047  | 1.429958  |
| C | -4.990383 | 2.256417  | 0.378717  |
| C | -2.924654 | 0.989933  | 0.944885  |
| H | -5.245232 | 4.877968  | 2.552892  |
| H | -1.973097 | 1.850679  | 2.679632  |
| C | -5.507316 | 4.225851  | 1.726389  |
| C | -6.144317 | 2.503627  | -0.388865 |
| C | -6.973868 | 3.586286  | -0.123249 |
| C | -6.634084 | 4.443009  | 0.948533  |
| H | -6.363461 | 1.814666  | -1.198255 |
| H | -7.273413 | 5.293716  | 1.171116  |
| C | -8.211795 | 3.852386  | -0.946585 |
| H | -9.116311 | 3.814168  | -0.327140 |
| H | -8.177545 | 4.847432  | -1.406826 |
| H | -8.323234 | 3.115624  | -1.747176 |
| C | -4.119652 | 1.102490  | 0.086781  |
| O | -4.423638 | 0.298788  | -0.806151 |
| O | -3.590603 | 2.931349  | 2.222540  |
| C | -1.875245 | -0.046323 | 0.940283  |
| H | -1.363004 | -0.151586 | 1.891506  |
| N | -1.400921 | -0.863981 | 0.049864  |
| N | -1.973066 | -0.769425 | -1.223389 |
| H | -2.965360 | -0.491499 | -1.246287 |
| C | -1.482368 | -1.587936 | -2.225196 |
| S | 0.074543  | -2.193522 | -2.149601 |
| N | -2.446362 | -1.931371 | -3.135647 |
| H | -3.340123 | -2.153756 | -2.694036 |
| N | -2.049866 | -2.779121 | -4.190043 |
| H | -1.904256 | -3.724355 | -3.828344 |
| H | -2.805035 | -2.787917 | -4.869698 |

|    |           |           |           |
|----|-----------|-----------|-----------|
| N  | 1.345290  | -0.767358 | 0.093340  |
| S  | -0.137479 | -2.199724 | 2.093734  |
| C  | 1.819766  | 0.034860  | -0.808779 |
| N  | 1.939227  | -0.763349 | 1.338951  |
| C  | 1.409757  | -1.606713 | 2.289746  |
| C  | 2.931092  | 1.001871  | -0.870997 |
| H  | 1.260986  | -0.043639 | -1.737492 |
| N  | 2.317314  | -1.967631 | 3.248668  |
| C  | 2.854779  | 1.843542  | -1.950056 |
| C  | 4.115158  | 1.116224  | 0.001723  |
| H  | 3.251671  | -2.139107 | 2.874376  |
| N  | 1.872457  | -2.847664 | 4.254659  |
| H  | 2.046185  | 1.795659  | -2.671732 |
| O  | 3.721521  | 2.808490  | -2.271545 |
| C  | 5.057915  | 2.189691  | -0.363062 |
| O  | 4.356578  | 0.377892  | 0.968142  |
| H  | 1.774729  | -3.789336 | 3.869692  |
| H  | 2.575053  | -2.849873 | 4.988353  |
| C  | 4.827992  | 2.996676  | -1.481130 |
| C  | 6.217273  | 2.423643  | 0.400956  |
| C  | 5.710127  | 4.016200  | -1.846714 |
| C  | 7.115571  | 3.429537  | 0.066764  |
| H  | 6.385069  | 1.786096  | 1.262985  |
| H  | 5.497330  | 4.618637  | -2.723538 |
| C  | 6.840420  | 4.221928  | -1.071169 |
| C  | 8.359737  | 3.680660  | 0.885342  |
| H  | 7.533914  | 5.012173  | -1.347888 |
| H  | 9.265679  | 3.549738  | 0.280892  |
| H  | 8.378513  | 4.705025  | 1.277176  |
| H  | 8.422357  | 2.994847  | 1.735019  |
| H  | 2.920971  | -0.449049 | 1.388303  |
| Cl | -1.614023 | -3.818937 | -0.114393 |
| Cd | -0.032108 | -2.197586 | -0.003136 |
| Cl | 1.546907  | -3.735087 | -0.062744 |

HF=-3432.3501245

**xyz coordinates of Isomer 5 for Cd(II) complex**

|   |           |           |           |
|---|-----------|-----------|-----------|
| C | -4.442194 | -2.129339 | 1.069154  |
| C | -6.741394 | -1.991027 | 0.704717  |
| C | -6.574719 | -0.809591 | -0.023023 |
| C | -4.127690 | -0.972697 | 0.399881  |
| H | -8.087591 | -3.477537 | 1.478488  |
| H | -3.687478 | -2.754116 | 1.534164  |
| C | -8.001950 | -2.558090 | 0.909032  |

|   |            |           |           |
|---|------------|-----------|-----------|
| C | -7.720602  | -0.189657 | -0.557805 |
| C | -8.988872  | -0.725482 | -0.373498 |
| C | -9.108844  | -1.921812 | 0.369964  |
| H | -7.576608  | 0.726038  | -1.122076 |
| H | -10.094052 | -2.355595 | 0.522651  |
| C | -10.217662 | -0.059464 | -0.946373 |
| H | -10.750102 | -0.729358 | -1.632697 |
| H | -10.924463 | 0.220217  | -0.155353 |
| H | -9.956839  | 0.847886  | -1.498649 |
| C | -5.235193  | -0.229400 | -0.227908 |
| O | -5.110157  | 0.808452  | -0.899208 |
| O | -5.663012  | -2.643799 | 1.243799  |
| C | -2.675051  | -0.714258 | 0.406064  |
| H | -2.085473  | -1.529409 | 0.820596  |
| N | -1.892323  | 0.244941  | 0.014995  |
| N | -2.498477  | 1.355672  | -0.539304 |
| H | -3.505186  | 1.298053  | -0.761106 |
| C | -1.721641  | 2.389451  | -0.976188 |
| S | -0.090123  | 2.400461  | -0.673686 |
| N | -2.443467  | 3.322893  | -1.680374 |
| H | -3.282544  | 2.968748  | -2.137095 |
| N | -1.771448  | 4.389814  | -2.286456 |
| H | -1.475830  | 4.141584  | -3.230455 |
| H | -2.399822  | 5.186681  | -2.319263 |
| N | 1.909835   | 0.374375  | -0.063378 |
| S | -0.001748  | 0.916014  | 1.987281  |
| C | 2.741889   | -0.144436 | -0.913248 |
| N | 2.461392   | 0.819236  | 1.128837  |
| C | 1.632030   | 1.150114  | 2.158874  |
| C | 4.172532   | -0.505436 | -0.893321 |
| H | 2.216214   | -0.450767 | -1.814046 |
| H | 3.486063   | 0.938416  | 1.170813  |
| N | 2.307495   | 1.662716  | 3.239073  |
| C | 4.491150   | -1.396680 | -1.886886 |
| C | 5.264263   | -0.031571 | -0.027020 |
| O | 5.139309   | 0.805235  | 0.884826  |
| H | 3.317056   | 1.531558  | 3.246384  |
| N | 1.649323   | 1.851269  | 4.454245  |
| H | 3.751901   | -1.780484 | -2.581454 |
| O | 5.698185   | -1.913952 | -2.134603 |
| C | 6.588607   | -0.609283 | -0.315699 |
| H | 1.875644   | 1.104940  | 5.109618  |
| H | 1.920468   | 2.748906  | 4.844195  |
| C | 6.757046   | -1.531799 | -1.352546 |
| C | 7.717527   | -0.249887 | 0.445831  |
| C | 8.002616   | -2.096530 | -1.639536 |
| C | 8.970028   | -0.792150 | 0.188122  |
| H | 7.573000   | 0.469342  | 1.245534  |

|    |           |           |           |
|----|-----------|-----------|-----------|
| H  | 8.090528  | -2.808879 | -2.453057 |
| C  | 9.092109  | -1.723140 | -0.868834 |
| C  | 10.179304 | -0.409662 | 1.008554  |
| H  | 10.065265 | -2.157389 | -1.084541 |
| H  | 10.594521 | -1.278384 | 1.534483  |
| H  | 10.977978 | -0.003607 | 0.375877  |
| H  | 9.927915  | 0.346456  | 1.757861  |
| Cl | 0.109041  | -1.808100 | 0.633678  |
| Cl | 0.019743  | -0.322378 | -2.121185 |
| Cd | 0.008738  | 0.309756  | -0.024220 |

HF=-3432.335477
